# Supplementary material
Source: PubMed Central journal article supplement (PMC9985486)
Supplement: NIHMS1839470-supplement-Supplementary_Information.pdf [file NIHMS1839470-supplement-Supplementary_Information.pdf]

Supplementary Information for:

Rare genetic variants explain missing heritability in smoking

Seon-Kyeong Jang<sup>1</sup>, Luke Evans<sup>2,3</sup>, Allison Fialkowski<sup>1</sup>, Donna K. Arnett<sup>4</sup>, Allison E. Ashley-Koch<sup>5</sup>, Kathleen C. Barnes<sup>6</sup>, Diane M. Becker<sup>7</sup>, Joshua C. Bis<sup>8</sup>, John Blangero<sup>9</sup>, Eugene R. Bleecker<sup>10</sup>, Meher Preethi Boorgula<sup>6</sup>, Donald W. Bowden<sup>11</sup>, Jennifer A. Brody<sup>8</sup>, Brian E. Cade<sup>12</sup>, Brenda W. Campbell Jenkins<sup>13</sup>, April P. Carson<sup>14</sup>, Sameer Chavan<sup>6</sup>, L. Adrienne Cupples<sup>15</sup>, Brian Custer<sup>16</sup>, Scott M. Damrauer<sup>17,18</sup>, Sean P. David<sup>19,20</sup>, Mariza de Andrade<sup>21</sup>, Carla L. Dinardo<sup>22</sup>, Tasha E. Fingerlin<sup>23,24</sup>, Myriam Fornage<sup>25</sup>, Barry I. Freedman<sup>26</sup>, Melanie E. Garrett<sup>5</sup>, Sina A. Gharib<sup>8,27</sup>, David C Glahn<sup>28</sup>, Jeffrey Haessler<sup>29</sup>, Susan R. Heckbert<sup>30,31</sup>, John E. Hokanson<sup>32</sup>, Lifang Hou<sup>33</sup>, Shih-Jen Hwang<sup>34</sup>, Matthew C. Hyman<sup>35</sup>, Renae Judy<sup>17</sup>, Anne E. Justice<sup>36</sup>, Robert C Kaplan<sup>29,37</sup>, Sharon L.R. Kardia<sup>38</sup>, Shannon Kelly<sup>39</sup>, Wonji Kim<sup>40</sup>, Charles Kooperberg<sup>29</sup>, Daniel Levy<sup>34,41</sup>, Donald M. Lloyd-Jones<sup>33</sup>, Ruth J.F. Loos<sup>42,43</sup>, Ani W. Manichaikul<sup>44</sup>, Mark T. Gladwin<sup>45</sup>, Lisa Warsinger Martin<sup>46</sup>, Mehdi Nouraie<sup>45</sup>, Olle Melander<sup>47,48</sup>, Deborah A. Meyers<sup>10</sup>, Courtney G. Montgomery<sup>49</sup>, Kari E. North<sup>50</sup>, Elizabeth C. Oelsner<sup>51</sup>, Nicholette D. Palmer<sup>11</sup>, Marinelle Payton<sup>52</sup>, Anna L. Peljto<sup>53</sup>, Patricia A. Peyser<sup>38</sup>, Michael Preuss<sup>42,43</sup>, Bruce M Psaty<sup>54</sup>, Dandi Qiao<sup>40</sup>, Daniel J. Rader<sup>35,55</sup>, Nicholas Rafaels<sup>6</sup>, Susan Redline<sup>56</sup>, Robert M. Reed<sup>57</sup>, Alexander P. Reiner<sup>29</sup>, Stephen S. Rich<sup>44</sup>, Jerome I. Rotter<sup>58</sup>, David A. Schwartz<sup>59,60</sup>, Aladdin H. Shadyab<sup>61</sup>, Edwin K. Silverman<sup>40</sup>, Nicholas L. Smith<sup>30,31</sup>, J. Gustav Smith<sup>62,63</sup>, Albert V. Smith<sup>64</sup>, Jennifer A. Smith<sup>38</sup>, Weihong Tang<sup>65</sup>, Kent D. Taylor<sup>58</sup>, Marilyn J. Telen<sup>5</sup>, Ramachandran S. Vasani<sup>66,67</sup>, Victor R. Gordeuk<sup>68</sup>, Zhe Wang<sup>42,43</sup>, Kerri L. Wiggins<sup>8</sup>, Lisa R. Yanek<sup>7</sup>, Ivana V. Yang<sup>53</sup>, Kendra A. Young<sup>32</sup>, Kristin L. Young<sup>50</sup>, Yingze Zhang<sup>45</sup>, Dajiang J. Liu<sup>69</sup>, Matthew C. Keller<sup>2</sup>, Scott Vrieze<sup>1\*</sup>

**Affiliations:**

1 Department of Psychology, University of Minnesota, Minneapolis, MN, USA

2 Institute for Behavioral Genetics, University of Colorado Boulder, Boulder, CO, USA

3 Department of Ecology & Evolution, University of Colorado Boulder, Boulder, CO, USA

4 Dean's Office, University of Kentucky College of Public Health, Lexington, KY, USA

5 Department of Medicine, Duke University School of Medicine, Durham, NC, USA

- 6 Division of Biomedical Informatics & Personalized Medicine, University of Colorado Anschutz Medical Campus, Aurora, CO, USA
- 7 Department of Medicine, Johns Hopkins University School of Medicine, Baltimore, MD, USA
- 8 Cardiovascular Health Research Unit, Department of Medicine, University of Washington, Seattle, WA, USA
- 9 Department of Human Genetics, University of Texas Rio Grande Valley School of Medicine, Brownsville, TX, USA
- 10 Department of Medicine, University of Arizona, Tucson, AZ, USA
- 11 Department of Biochemistry, Wake Forest School of Medicine, Winston-Salem, NC, USA
- 12 Department of Medicine, Brigham and Women's Hospital, Harvard Medical School, Boston, MA, USA, USA
- 13 Jackson Heart Study Graduate Training and Education Center, Jackson State University School of Public Health, Jackson, MS, USA
- 14 Department of Medicine, University of Mississippi Medical Center, Jackson, MS, USA
- 15 Department of Biostatistics, Boston University School of Public Health, Boston, MA, USA
- 16 Vitalant Research Institute, San Francisco CA, USA
- 17 Department of Surgery, Perelman School of Medicine, University of Pennsylvania, Philadelphia, PA, USA
- 18 Department of Surgery, Corporal Michael Crescenz VA Medical Center, Philadelphia, PA, USA
- 19 Department of Family Medicine, Pritzker School of Medicine, University of Chicago, Chicago, IL, USA
- 20 NorthShore University HealthSystem, Evanston, IL, USA
- 21 Department of Health Sciences Research, Mayo Clinic, Rochester, MN, USA.
- 22 Fundação Pro Sangue, São Paulo, Brazil
- 23 Colorado School of Public Health, University of Colorado Denver - Anschutz Medical Campus, Aurora, CO, USA
- 24 Center for Genes Environment and Health, National Jewish Health, Denver, CO, USA.
- 25 Brown Foundation Institute of Molecular Medicine, McGovern Medical School, the University of Texas Health Science Center at Houston, Houston, TX, USA
- 26 Section on Nephrology, Department of Internal Medicine, Wake Forest School of Medicine, Winston-Salem, NC, USA
- 27 Center for Lung Biology, Division of Pulmonary, Critical Care and Sleep Medicine, University of Washington, Seattle, WA, USA
- 28 Department of Psychiatry, Boston Children's Hospital and Harvard Medical School, Boston, MA, USA

- 29 Division of Public Health Sciences, Fred Hutchinson Cancer Research Center, Seattle, WA, USA
- 30 Department of Epidemiology, University of Washington, Seattle WA, USA
- 31 Kaiser Permanente Washington Health Research Institute, Kaiser Permanente Washington, Seattle WA, USA
- 32 Department of Epidemiology, Colorado School of Public Health, University of Colorado Anschutz Medical Campus, Aurora, CO, USA
- 33 Department of Preventive Medicine, Northwestern University, Chicago, IL, USA
- 34 Population Sciences Branch, National Heart, Lung, and Blood Institute, National Institutes of Health, Bethesda, MD, USA
- 35 Department of Medicine, Perelman School of Medicine, University of Pennsylvania, Philadelphia, PA, USA
- 36 Department of Population Health Sciences, Geisinger Health System, Danville, PA, USA
- 37 Department of Epidemiology and Population Health, Albert Einstein College of Medicine, Bronx, NY, USA
- 38 Department of Epidemiology, School of Public Health, University of Michigan, Ann Arbor, MI, USA
- 39 Department of Pediatrics, UCSF Benioff Children's Hospital Oakland, Oakland, CA, USA
- 40 Channing Division of Network Medicine, Brigham and Women's Hospital and Harvard Medical School, Boston, MA, USA
- 41 Framingham Heart Study, Framingham, MA, USA
- 42 Charles Bronfman Institute for Personalized Medicine, Icahn School of Medicine at Mount Sinai, New York, NY, USA
- 43 The Mindich Child Health and Development Institute, Icahn School of Medicine at Mount Sinai, New York, NY, USA
- 44 Center for Public Health Genomics, School of Medicine, University of Virginia, Charlottesville, VA, USA
- 45 Department of Medicine, University of Pittsburgh School of Medicine, Pittsburgh, PA, USA
- 46 Division of Cardiology, School of Medicine and Health Sciences, Washington, DC, USA
- 47 Department of Clinical Sciences, Lund University, Malmö, Sweden
- 48 Department of Internal Medicine, Skåne University Hospital, Malmö, Sweden
- 49 Genes and Human Disease Research Program, Oklahoma Medical Research Foundation, Oklahoma City, OK, USA
- 50 Department of Epidemiology, Gillings School of Global Public Health, University of North Carolina at Chapel Hill, Chapel Hill, NC, USA

- 51 Division of General Medicine, Columbia University Irving Medical Center, Columbia University, New York, NY, USA
- 52 Department of Epidemiology and Biostatistics, Jackson Heart Study Graduate Training and Education Center, Jackson State University School of Public Health, Jackson, MS, USA
- 53 Department of Medicine, University of Colorado School of Medicine, Aurora, CO, USA
- 54 Cardiovascular Health Research Unit, Department of Medicine, Epidemiology and Health Services, University of Washington, Seattle, WA, USA
- 55 Department of Genetics, Perelman School of Medicine, University of Pennsylvania, Philadelphia, PA, USA
- 56 Department of Medicine, Brigham and Women's Hospital, Harvard Medical School, Boston, MA, US
- 57 University of Maryland School of Medicine, Baltimore, MD, USA
- 58 The Institute for Translational Genomics and Population Sciences, Department of Pediatrics, The Lundquist Institute for Biomedical Innovation at Harbor-UCLA Medical Center, Torrance, CA, USA
- 59 Department of Medicine, School of Medicine, University of Colorado Denver, Aurora, CO, USA
- 60 Department of Immunology, School of Medicine, University of Colorado Denver, Aurora, CO, USA
- 61 Herbert Wertheim School of Public Health and Human Longevity Science, University of California, San Diego, La Jolla, CA, USA
- 62 Wallenberg Laboratory/Department of Molecular and Clinical Medicine, Institute of Medicine, Gothenburg University, Sweden
- 63 Department of Cardiology, Sahlgrenska University Hospital, Gothenburg, Sweden
- 64 Department of Biostatistics, School of Public Health, University of Michigan, Ann Arbor, MI, USA
- 65 Division of Epidemiology and Community Health, School of Public Health, University of Minnesota, Minneapolis, MN, USA
- 66 Sections of Preventive medicine and Epidemiology and cardiovascular medicine, Department of medicine, Boston University School of Medicine, Boston, MA, USA
- 67 Department of Epidemiology, Boston University School of Public Health, Boston, MA, USA
- 68 Department of Medicine, University of Illinois at Chicago, Chicago, IL, USA
- 69 Department of Public Health Sciences, Penn State College of Medicine, Hershey, PA, USA

Corresponding author: [vrieze@umn.edu](mailto:vrieze@umn.edu)

Supplementary Note 1 GREML-LDMS-I analysis in individuals with European ancestry

Supplementary Note 2 GREML-LDMS-I analysis in individuals with African ancestry

Supplementary Note 3 Study-specific Acknowledgements and Disclaimer

Supplementary Note 4 TOPMed Omics Support Table

Supplementary Note 5 Full TOPMed Banner Authorship list

Supplementary Figure 1 Heritability estimates in samples with different levels of population structure

Supplementary Figure 2 Principal components 1-4 of four different IQR samples

Supplementary Figure 3 Global ancestry proportions of African ancestry sample

Supplementary Figure 4.1-6 Distribution of Genetic Relatedness Matrix off-diagonals in European ancestry

Supplementary Figure 5.1-5 Distribution of Genetic Relatedness Matrix off-diagonals in African ancestry

## **Supplementary Note 1. GREML-LDMS-I analysis in individuals with European ancestry**

### *Sample selection*

To select the European-ancestry sample, we applied a two-step procedure, described below, to evaluate the convergence of the two different approaches. First, an initial set of European genomes was selected by projecting 1000 Genome (1000G) PC loadings onto TOPMed genotypes (freeze 8; autosomes only) and applying K-nearest neighbors classification on the h20 projected PCs using open source software FRAPOSA<sup>1</sup>. This software uses online augmentation-decomposition-transformation (OADP) for projection to avoid potential misalignment and shrinkage bias. To calculate 1000G PC loadings, SNPs common in both 1000G and TOPMed were extracted and pruned for LD using plink 1.9 (--indep-pairwise 100kb 5 0.1) and went through other quality control filters (--geno 0.01, --mind 0.01), resulting in a total of 103,646 variants. Then, genetic PCs for the TOPMed samples were calculated using plink 1.9 (--score). Ancestry was assigned based on “votes” of the top 20 closest neighbors (uniformly weighted) in the 1000G dataset in terms of PC 1-20 scores. As in the original paper<sup>1</sup>, those having probability of being European ancestry greater than .875 made an initial set of European ancestry (N=38,915 for EUR sample having at least one smoking phenotypes). Visual inspection of the PC 1-4 plots of this initial sample suggested residual heterogeneity within the European ancestry sample. Therefore, we further restricted samples via following way: 1), we created four increasingly restrictive samples based on Euclidean distance of PC 1-4 from the vertex (maximum of PC1, minimum of PC2, and PC3-4 values evaluated at the maximum value of PC1). Then, we calculated Euclidean distance from this vertex for each individual and removed outliers having a distance greater than 3, 2, 1.5, and 1 times Inter-Quartile Range (IQR), each comprising four increasingly restrictive sample sets. The 1 IQR sample (i.e., most conservative with respect to population structure) was used for our main analyses with the remaining samples reserved for sensitivity analysis. Sample size and PC1-4 plots of the resulting samples are presented in Supplementary Table 12 and Supplementary Fig. 2.

## *Phenotypes*

We applied the same definition for phenotypes as used in the recent GWAS of tobacco use<sup>2</sup>. Age of smoking initiation (AgeSmk) is a continuous variable indicating the age at which an individual started smoking regularly. Cigarettes per day (CigDay) is an ordinal variable with 5 bins (1-5) with higher numbers indicating a higher average number of cigarettes smoked per day, either as a current smoker or former smoker. Specifically, each bin indicates the following quantity: bin1 (1~5), bin2 (6~15), bin3 (16~25), bin4 (26~35), bin5 (36+). Individuals who never smoked were set to missing. Smoking cessation (SmkCes) is a binary phenotype: current (case=1) versus former smoker (control=0). Smoking initiation (SmkInit) is also a binary variable measuring whether one reports ever being a regular smoker in their life (i.e., ever smoked 100 cigarettes in their life) versus (case=1) never smoker (control=0). Supplementary Table 8 shows cohort-wide and cohort-level descriptive statistics of four smoking phenotypes. The relationship among four smoking phenotypes was explored using linear mixed-effects regression (Supplementary Table 7). For each phenotype, they were regressed on age, sex, and the two remaining smoking phenotypes (except for SmkInit) as fixed covariates and cohort as a random intercept. The relation between SmkInit and other variables could not be estimated because every individual reporting AgeSmk, CigDay, and SmkCes, were lifetime smokers. In R (v3.6.3), we used `lme` function in `nLme` (v3.1) package for quantitative traits and `glmer` function for binary traits in `lme4` (v1.1) package.

## *Local Permutation analysis*

We estimated the potential amount of residual population stratification using permutation method. First, we calculated genetic distances between the *i*-th and the *j*-th individual using the following formula:  $\sum_{k=1}^{11} \lambda_k |PC_{ki} - PC_{kj}|^2$ , where PCs are principal components calculated with common variants and  $\lambda_k$  is eigenvalue corresponding to the *k*-th PCs. Then, we generated a list of permutations by randomly

exchanging the  $i$ -th individual with one of their 100 nearest neighbors which includes themselves. A more detailed procedure of generating permutation is described elsewhere<sup>3</sup>. Similar to this study, we dropped the first 50 permutations and sampled each permutation list with a step of 5 to ensure relative independence between the permutation lists. Taking a semi-empirical approach, we calculated the mean and standard deviations of 100 permutation trials and used them to construct empirical null distribution,  $N(\mu, \sigma^2)$ . Mean heritability departing from zero would indicate potential confounding bias by population stratification. We conducted a one-tailed z-test for 6 bins of each phenotype to test whether  $\mu$  is significantly different from zero (Supplementary Table 4).

#### *Pedigree-based narrow-sense heritability*

For pedigree-based analysis, we only included cohorts having more than 10 pairs of close relatives (i.e., those related greater than .375) from 1 IQR European sample which has not been filtered by relatedness yet. This is to prevent the relatedness structure from becoming too low in which case heritability estimates can be deflated<sup>4</sup>. Then, we removed one in the pairs related to greater than .8 to prevent duplicates or monozygotic twins (which are indistinguishable) being accidentally included. Next, we created a GRM using variants with MAF greater than .05. We set pairs related less than .05 as 0 in the same GRM to prevent deflation of heritability estimates. This resulted in a GRM based on the 6th degree, or closer, relatives, including all relative pairs excluded in the SNP heritability analyses described throughout this report, as well as unrelated individuals. Such a GRM includes additive effects of common variants, but also additive effects of all variants in haplotypes shared among relatives, including common and rare SNPs. This modified GRM was entered as a random effect together with two other random effects, a cohort effect and a shared environment effect. We created the shared environment GRM by setting pairs related greater than .375 as 1 and 0 otherwise. We entered the same set of fixed effects (demographic, sequencing center, and genetic PCs) used in our main SNP-based heritability analysis. We found that fitting both genetic and shared environment GRMs did not converge or produced non-sensible



estimates due to strong dependence between the genetic GRM and the shared environment GRM. Therefore, we reported results from models with only the genetic and cohort random effects, understanding that the estimates can be upwardly biased due to shared environment effect.

## **Supplementary Note 2. GREML-LDMS-I analysis in individuals with African ancestry**

### *Sample*

We initially had 8,546, 8,894, 10,361, and 19,632 African admixed individuals (as predicted by OADP ancestry prediction) for AgeSmk, CigDay, SmkCes, and SmkInit, respectively. Unrelated samples were selected based on kinship coefficients calculated by PC-relate (`pcrelate` in GENESIS R package) which estimates kinship in admixed samples conditional on ancestry<sup>5</sup>. A total of 638,486 LD-pruned variants ( $|LD| < .32$ ) with MAF greater than 1% were used to calculate relatedness. We applied `pcairPartition` in GENESIS package with kinship coefficient threshold  $< .0125$  to select unrelated individuals (equivalent to  $\hat{\pi} < .025$ ). While a majority of individuals showed two-way (African-European) admixture, some individuals showed more complex admixture patterns. We excluded these individuals with global ancestry proportion of either Central-South Asia, East Asia, Native America, and Middle East greater than 10% (N=58). Global ancestry proportions were derived from local ancestry estimates from RFMix where local ancestry of each homologous chromosome was estimated at 610,860 autosomal SNPs using Human Genome Diversity Panel (HGDP)<sup>6</sup> as a reference panel. Descriptive statistics of each cohort are presented in Supplementary Table 8 and the global ancestry proportion of the sample is presented in Supplementary Fig. 3. As in European ancestry analysis, we performed LD-pruning (indep-pairwise 100 5 0.2 for common, indep-pairwise 2000 10 0.02 for rare variants) and estimated 50 PCs using ~1M common (MAF 1-50%) variants and another 50 PCs from ~6M rare variants (MAF 0.01-1%). These 100 PCs were used as fixed effect covariates in GREML-LDMS-I analysis.

### *Local ancestry kinship*

Individuals with similar global ancestry proportions can exhibit variable local ancestry compositions. Adjustment of local ancestral backgrounds was previously shown to produce less biased heritability estimates in admixed populations for other traits<sup>7</sup>. We modeled the effect of local ancestry as a random effect by constructing local ancestry-based kinship. Local ancestry kinship was constructed by the following procedure: 1) local ancestry genotype matrix was created with each individual assigned either 0 or 1 or 2 depending on the number of Sub-Saharan African allele at 610,860 autosomal variants from HGDP. Then, we standardized this matrix by:  $\bar{y}_{i,s} = (\gamma_{i,s} - 2\hat{\theta}) / \sqrt{2\hat{\theta}(1 - \hat{\theta})}$  where  $\gamma_{i,s}$  indicates local ancestry of the  $i$ -th individual at variant  $s$  and  $\hat{\theta}$  indicates mean African ancestry proportion of current sample<sup>8</sup>. We created a GRM based on the standardized local ancestry matrix and included it as a random effect in GREML-LDMS-I analysis.

## References

1. Zhang, D., Dey, R., and Lee, S. (2020). Fast and robust ancestry prediction using principal component analysis. *Bioinformatics* 36, 3439–3446.
2. Liu, M., Jiang, Y., Wedow, R., Li, Y., Brazel, D.M., Chen, F., Datta, G., Davila-Velderrain, J., McGuire, D., Tian, C., et al. (2019). Association studies of up to 1.2 million individuals yield new insights into the genetic etiology of tobacco and alcohol use. *Nat Genet* 51, 237–244.
3. Mullaert, J., Bouaziz, M., Seeleuthner, Y., Bigio, B., Casanova, J.-L., Alcaïs, A., Abel, L., and Cobat, A. (2021). Taking population stratification into account by local permutations in rare-variant association studies on small samples. *Genet Epidemiol* 45, 821–829.
4. Zaitlen, N., Kraft, P., Patterson, N., Pasaniuc, B., Bhatia, G., Pollack, S., and Price, A.L. (2013). Using Extended Genealogy to Estimate Components of Heritability for 23 Quantitative and Dichotomous Traits. *PLOS Genetics* 9, e1003520.
5. Conomos, M.P., Reiner, A.P., Weir, B.S., and Thornton, T.A. (2016). Model-free Estimation of Recent Genetic Relatedness. *Am J Hum Genet* 98, 127–148.
6. Bergström, A., McCarthy, S.A., Hui, R., Almarri, M.A., Ayub, Q., Danecek, P., Chen, Y., Felkel, S., Hallast, P., Kamm, J., et al. (2020). Insights into human genetic variation and population history from 929 diverse genomes. *Science* 367, eaay5012.
7. Zhong, Y., Perera, M.A., and Gamazon, E.R. (2019). On Using Local Ancestry to Characterize the Genetic Architecture of Human Traits: Genetic Regulation of Gene Expression in Multiethnic or Admixed Populations. *Am J Hum Genet* 104, 1097–1115.
8. Zaitlen, N., Pasaniuc, B., Sankararaman, S., Bhatia, G., Zhang, J., Gusev, A., Young, T., Tandon, A., Pollack, S., Vilhjálmsson, B.J., et al. (2014). Leveraging population admixture to explain missing heritability of complex traits. *Nat Genet* 46, 1356–1362.

### Supplementary Note 3. Study-specific Acknowledgements and Disclaimer

| Study's short name | Study name                                           | PI                                               | Study-specific acknowledgements details                                                                                                                                                                                                                                                                                                                                                                                                                                                                                                                                                                                                                                                                                                                                                                                                                                                                                                                                                                                                                                                                                                                                                                                                                                                                                                                                                                                                                                                                                                                                                                                                                                                                                                                                                                                                                            | TOPMed accession number |
|--------------------|------------------------------------------------------|--------------------------------------------------|--------------------------------------------------------------------------------------------------------------------------------------------------------------------------------------------------------------------------------------------------------------------------------------------------------------------------------------------------------------------------------------------------------------------------------------------------------------------------------------------------------------------------------------------------------------------------------------------------------------------------------------------------------------------------------------------------------------------------------------------------------------------------------------------------------------------------------------------------------------------------------------------------------------------------------------------------------------------------------------------------------------------------------------------------------------------------------------------------------------------------------------------------------------------------------------------------------------------------------------------------------------------------------------------------------------------------------------------------------------------------------------------------------------------------------------------------------------------------------------------------------------------------------------------------------------------------------------------------------------------------------------------------------------------------------------------------------------------------------------------------------------------------------------------------------------------------------------------------------------------|-------------------------|
| ARIC               | Atherosclerosis Risk in Communities Study VTE cohort | Eric Boerwinkle<br><Eric.Boerwinkle@uth.tmc.edu> | <p>Whole genome sequencing (WGS) for the Trans-Omics in Precision Medicine (TOPMed) program was supported by the National Heart, Lung and Blood Institute (NHLBI). WGS for “NHLBI TOPMed: Atherosclerosis Risk in Communities (ARIC)” (phs001211) was performed at the Baylor College of Medicine Human Genome Sequencing Center (HHSN268201500015C and 3U54HG003273-12S2) and the Broad Institute for MIT and Harvard (3R01HL092577-06S1). Centralized read mapping and genotype calling, along with variant quality metrics and filtering were provided by the TOPMed Informatics Research Center (3R01HL-117626-02S1). Phenotype harmonization, data management, sample-identity QC, and general study coordination, were provided by the TOPMed Data Coordinating Center (3R01HL- 120393-02S1). We gratefully acknowledge the studies and participants who provided biological samples and data for TOPMed.</p> <p>The Genome Sequencing Program (GSP) was funded by the National Human Genome Research Institute (NHGRI), the National Heart, Lung, and Blood Institute (NHLBI), and the National Eye Institute (NEI). The GSP Coordinating Center (U24 HG008956) contributed to cross-program scientific initiatives and provided logistical and general study coordination. The Centers for Common Disease Genomics (CCDG) program was supported by NHGRI and NHLBI, and whole genome sequencing was performed at the Baylor College of Medicine Human Genome Sequencing Center (UM1 HG008898 and R01HL059367).</p> <p>The Atherosclerosis Risk in Communities study has been funded in whole or in part with Federal funds from the National Heart, Lung, and Blood Institute, National Institutes of Health, Department of Health and Human Services (contract numbers HHSN268201700001I, HHSN268201700002I, HHSN268201700003I, HHSN268201700004I and</p> | phs001211               |

|        |                                                                                                                    |                                                                                                                                                                                          |                                                                                                                                                                                                                                                                                                                                                                                                                                                                                                                                                                                                                                                                                                                                                                                                                                                                                                                                                                                                                                                                                                                         |           |
|--------|--------------------------------------------------------------------------------------------------------------------|------------------------------------------------------------------------------------------------------------------------------------------------------------------------------------------|-------------------------------------------------------------------------------------------------------------------------------------------------------------------------------------------------------------------------------------------------------------------------------------------------------------------------------------------------------------------------------------------------------------------------------------------------------------------------------------------------------------------------------------------------------------------------------------------------------------------------------------------------------------------------------------------------------------------------------------------------------------------------------------------------------------------------------------------------------------------------------------------------------------------------------------------------------------------------------------------------------------------------------------------------------------------------------------------------------------------------|-----------|
|        |                                                                                                                    |                                                                                                                                                                                          | HHSN268201700005I). The authors thank the staff and participants of the ARIC study for their important contributions.                                                                                                                                                                                                                                                                                                                                                                                                                                                                                                                                                                                                                                                                                                                                                                                                                                                                                                                                                                                                   |           |
| BAGS   | New Approaches for Empowering Studies of Asthma in Populations of African Descent - Barbados Asthma Genetics Study | Kathleen Barnes<br><Kathleen.barnes@Tempus.com>                                                                                                                                          | We gratefully acknowledge the contributions of Harold Watson, Clive Landis, Desiree Walcott, Pissamai and Trevor Maul, Paul Levett, Anselm Hennis, P. Michele Lashley, Raana Naidu, Malcolm Howitt and Timothy Roach for their contributions in the field and support at the Chronic Disease Research Centre. The authors wish to thank the numerous health care providers, and community clinics and co-investigators who assisted in the phenotyping and collection of DNA samples, and the families and patients for generously donating DNA samples to the Barbados Asthma Genetics Study (BAGS). Funding for BAGS was provided by National Institutes of Health (NIH) R01HL104608, R01HL087699, HL104608 S1, R01AI132476, and R01AI114555.                                                                                                                                                                                                                                                                                                                                                                         | phs001143 |
| BioMe  | Mount Sinai BioMe Biobank                                                                                          | Ruth J.F. Loos<br>< <a href="mailto:ruth.loos@mssm.edu">ruth.loos@mssm.edu</a> ><br>Eimear Kenny<br>< <a href="mailto:eimear.kenny@mssm.edu">eimear.kenny@mssm.edu</a> >                 | This research was supported by NIH grant X01HL134588.                                                                                                                                                                                                                                                                                                                                                                                                                                                                                                                                                                                                                                                                                                                                                                                                                                                                                                                                                                                                                                                                   | phs001644 |
| CARDIA | Coronary Artery Risk Development in Young Adults                                                                   | Myriam Fornage<br>< <a href="mailto:Myriam.Fornage@uth.tmc.edu">Myriam.Fornage@uth.tmc.edu</a> ><br>Lifang Hou<br>< <a href="mailto:l-hou@northwestern.edu">l-hou@northwestern.edu</a> > | Molecular data for the Trans-Omics in Precision Medicine (TOPMed) program was supported by the National Heart, Lung and Blood Institute (NHLBI). Whole Genome Sequencing for the NHLBI TOPMed: CARDIA Study (phs001612) was performed at the Baylor College of Medicine Human genome Sequencing Center (contract HHSN268201600033I). Core support including centralized genomic read mapping and genotype calling, along with variant quality metrics and filtering were provided by the TOPMed Informatics Research Center (3R01HL-117626-02S1; contract HHSN268201800002I). Core support including phenotype harmonization, data management, sample-identity QC, and general program coordination were provided by the TOPMed Data Coordinating Center (R01HL-120393; U01HL-120393; contract HHSN268201800001I). We gratefully acknowledge the studies and participants who provided biological samples and data for TOPMed.<br><br>The Coronary Artery Risk Development in Young Adults Study (CARDIA) is conducted and supported by the National Heart, Lung, and Blood Institute (NHLBI) in collaboration with the | phs001612 |

|                  |                                            |                                                                                                    |                                                                                                                                                                                                                                                                                                                                                                                                                                                                                                                                                                                                                                                                                                                                                                                                                                                                                                                                                                                                                                                                              |           |
|------------------|--------------------------------------------|----------------------------------------------------------------------------------------------------|------------------------------------------------------------------------------------------------------------------------------------------------------------------------------------------------------------------------------------------------------------------------------------------------------------------------------------------------------------------------------------------------------------------------------------------------------------------------------------------------------------------------------------------------------------------------------------------------------------------------------------------------------------------------------------------------------------------------------------------------------------------------------------------------------------------------------------------------------------------------------------------------------------------------------------------------------------------------------------------------------------------------------------------------------------------------------|-----------|
|                  |                                            |                                                                                                    | University of Alabama at Birmingham (HHSN2682018000051 & HHSN2682018000071), Northwestern University (HHSN2682018000031), University of Minnesota (HHSN2682018000061), and Kaiser Foundation Research Institute (HHSN268201800004).                                                                                                                                                                                                                                                                                                                                                                                                                                                                                                                                                                                                                                                                                                                                                                                                                                          |           |
| CFS              | Cleveland Family Study - WGS Collaboration | Susan Redline<br><sredline1@rics.bwh.harvard.edu>                                                  | The Cleveland Family Study has been supported in part by National Institutes of Health grants [R01-HL046380, KL2-RR024990, R35-HL135818, and R01-HL113338].                                                                                                                                                                                                                                                                                                                                                                                                                                                                                                                                                                                                                                                                                                                                                                                                                                                                                                                  | phs000954 |
| CHS              | Cardiovascular Health Study                | Bruce Psaty<br><psaty@u.washington.edu><br>Russell Tracy<br><Russell.Tracy@uvm.edu>                | This CHS research was supported by NHLBI contracts HHSN268201200036C, HHSN268200800007C, HHSN268201800001C, N01HC55222, N01HC85079, N01HC85080, N01HC85081, N01HC85082, N01HC85083, N01HC85086, 75N92021D00006; and NHLBI grants U01HL080295, R01HL087652, R01HL105756, R01HL103612, R01HL120393, and U01HL130114 with additional contribution from the National Institute of Neurological Disorders and Stroke (NINDS). Additional support was provided through R01AG023629 from the National Institute on Aging (NIA). A full list of principal CHS investigators and institutions can be found at CHS-NHLBI.org. The provision of genotyping data was supported in part by the National Center for Advancing Translational Sciences, CTSI grant UL1TR001881, and the National Institute of Diabetes and Digestive and Kidney Disease Diabetes Research Center (DRC) grant DK063491 to the Southern California Diabetes Endocrinology Research Center.<br><br>Dr. Psaty serves on the Steering Committee of the Yale Open Data Access Project funded by Johnson & Johnson. | phs001368 |
| CHS_VTE          | Cardiovascular Health Study                | Susan Heckbert<br><heckbert@uw.edu>                                                                | Please contact the study PI.                                                                                                                                                                                                                                                                                                                                                                                                                                                                                                                                                                                                                                                                                                                                                                                                                                                                                                                                                                                                                                                 | phs001368 |
| COPDGene/Eclipse | Genetic Epidemiology of COPD Study         | Edwin Silverman<br><ed.silverman@channing.harvard.edu>                                             | This research was supported by NIH grants U01 HL089856 and U01 HL089897. ECLIPSE was supported by GSK.<br><br>Dr. Silverman has received grant support from GSK and Bayer.                                                                                                                                                                                                                                                                                                                                                                                                                                                                                                                                                                                                                                                                                                                                                                                                                                                                                                   | phs000951 |
| DHS              | Diabetes Heart Study                       | Nichollette Palmer<br><nallred@wakehealth.edu><br><br>Donald W. Bowden<br><dbowden@wakehealth.edu> | This work was supported by R01 HL92301, R01 HL67348, R01 NS058700, R01 AR48797, R01 DK071891, R01 AG058921, the General Clinical Research Center of the Wake Forest University School of Medicine (M01 RR07122, F32 HL085989), the American Diabetes Association, and a pilot grant from the Claude Pepper Older Americans Independence                                                                                                                                                                                                                                                                                                                                                                                                                                                                                                                                                                                                                                                                                                                                      | phs001412 |

|          |                                              |                                                                                                                  |                                                                                                                                                                                                                                                                                                                                                                                                                                                                                                                                                                                                                                                                                                                                                                                                                                                                                                                                                                                                                                                                                                                                                                                                                                        |           |
|----------|----------------------------------------------|------------------------------------------------------------------------------------------------------------------|----------------------------------------------------------------------------------------------------------------------------------------------------------------------------------------------------------------------------------------------------------------------------------------------------------------------------------------------------------------------------------------------------------------------------------------------------------------------------------------------------------------------------------------------------------------------------------------------------------------------------------------------------------------------------------------------------------------------------------------------------------------------------------------------------------------------------------------------------------------------------------------------------------------------------------------------------------------------------------------------------------------------------------------------------------------------------------------------------------------------------------------------------------------------------------------------------------------------------------------|-----------|
|          |                                              |                                                                                                                  | Center of Wake Forest University Health Sciences (P60 AG10484).                                                                                                                                                                                                                                                                                                                                                                                                                                                                                                                                                                                                                                                                                                                                                                                                                                                                                                                                                                                                                                                                                                                                                                        |           |
| EOCOPD   | Boston Early-Onset COPD Study                | Edwin Silverman<br><ed.silverman@channing.harvard.edu>                                                           | The Boston Early-Onset COPD Study was supported by R01 HL113264 and U01 HL089856 from the National Heart, Lung, and Blood Institute.                                                                                                                                                                                                                                                                                                                                                                                                                                                                                                                                                                                                                                                                                                                                                                                                                                                                                                                                                                                                                                                                                                   | phs000946 |
| FHS      | Framingham Heart Study                       | Vasan S. Ramachandran<br><vasan@bu.edu><br><br>Nancy Heard-Costa<br><nheard@bu.edu>, Dan Levy<br><LevyD@nih.gov> | <p>This investigation includes data From the Framingham Heart Study of the National Heart Lung and Blood Institute of the National Institutes of Health and Boston University School of Medicine. This project has been funded in part with Federal funds from the National Heart, Lung, and Blood Institute, National Institutes of Health, Department of Health and Human Services, under Contract No. 75N92019D00031.</p> <p>The Framingham Heart Study (FHS) acknowledges the support of Contracts NO1-HC-25195, HHSN268201500001I and 75N92019D00031 from the National Heart, Lung and Blood Institute and grant supplement R01 HL092577-06S1 for this research. We also acknowledge the dedication of the FHS study participants without whom this research would not be possible. Dr. Vasan is supported in part by the Evans Medical Foundation and the Jay and Louis Coffman Endowment from the Department of Medicine, Boston University School of Medicine.</p> <p>The views expressed in this manuscript are those of the authors and do not necessarily represent the views of the National Heart, Lung, and Blood Institute; the National Institutes of Health; or the U.S. Department of Health and Human Services.</p> | phs000974 |
| GeneSTAR | Genetic Studies of Atherosclerosis Risk      | Rasika Mathias<br><rmathias@jhmi.edu>                                                                            | GeneSTAR was supported by the National Institutes of Health/National Heart, Lung, and Blood Institute (U01 HL72518, HL087698, HL112064) and by a grant from the National Institutes of Health/National Center for Research Resources (M01- R000052) to the Johns Hopkins General Clinical Research Center.                                                                                                                                                                                                                                                                                                                                                                                                                                                                                                                                                                                                                                                                                                                                                                                                                                                                                                                             | phs001218 |
| GENOA    | Genetic Epidemiology Network of Arteriopathy | Sharon Kardia<br><skardia@umich.edu><br><br>Jennifer Smith<br><smjenn@umich.edu>                                 | Support for GENOA was provided by the National Heart, Lung and Blood Institute (HL054457, HL054464, HL054481, HL119443, and HL087660) of the National Institutes of Health. GENOA may also require study-specific acknowledgements depending on the phenotypes analyzed (please consult with the GENOA co-author on the paper).                                                                                                                                                                                                                                                                                                                                                                                                                                                                                                                                                                                                                                                                                                                                                                                                                                                                                                        | phs001345 |

|                 |                                                                                |                                                                                                     |                                                                                                                                                                                                                                                                                                                                                                                                                                                                                                                                                                                                                                                                                                                                                                                                                                                                                                                                                                                                                                                                                                                                                                                                                                                                                         |           |
|-----------------|--------------------------------------------------------------------------------|-----------------------------------------------------------------------------------------------------|-----------------------------------------------------------------------------------------------------------------------------------------------------------------------------------------------------------------------------------------------------------------------------------------------------------------------------------------------------------------------------------------------------------------------------------------------------------------------------------------------------------------------------------------------------------------------------------------------------------------------------------------------------------------------------------------------------------------------------------------------------------------------------------------------------------------------------------------------------------------------------------------------------------------------------------------------------------------------------------------------------------------------------------------------------------------------------------------------------------------------------------------------------------------------------------------------------------------------------------------------------------------------------------------|-----------|
| GOLDN/Hyper GEN | Genetics of Lipid Lowering Drugs and Diet Network                              | Donna K Arnett<br><donna.arnett@uky.edu>                                                            | This research was supported by NIH grant 1R01 HL091357.                                                                                                                                                                                                                                                                                                                                                                                                                                                                                                                                                                                                                                                                                                                                                                                                                                                                                                                                                                                                                                                                                                                                                                                                                                 | phs001359 |
| HCHS_SOL        | Hispanic Community Health Study - Study of Latinos                             | Robert Kaplan<br><Robert.Kaplan@einsteinmed.org><br>Kari North<br><kari_north@unc.edu>              | This research was supported by NIH grants R01HG010297 and U01HG007416. All HCHS/SOL participants provided informed consent, and the study was approved by the Institutional Review Board of local field centers, coordinating center and laboratories.<br><br>The Hispanic Community Health Study/Study of Latinos is a collaborative study supported by contracts from the National Heart, Lung, and Blood Institute (NHLBI) to the University of North Carolina (HHSN268201300001I / N01-HC-65233), University of Miami (HHSN268201300004I / N01-HC-65234), Albert Einstein College of Medicine (HHSN268201300002I / N01-HC-65235), University of Illinois at Chicago – HHSN268201300003I / N01-HC-65236 Northwestern Univ), and San Diego State University (HHSN268201300005I / N01-HC-65237). The following Institutes/Centers/Offices have contributed to the HCHS/SOL through a transfer of funds to the NHLBI: National Institute on Minority Health and Health Disparities, National Institute on Deafness and Other Communication Disorders, National Institute of Dental and Craniofacial Research, National Institute of Diabetes and Digestive and Kidney Diseases, National Institute of Neurological Disorders and Stroke, NIH Institution-Office of Dietary Supplements. | phs001395 |
| HVH             | Heart and Vascular Health Study                                                | Susan Heckbert<br><heckbert@uw.edu>                                                                 | The Heart and Vascular Health Study was supported by grants HL068986, HL085251, HL095080, and HL073410 from the National Heart, Lung, and Blood Institute.                                                                                                                                                                                                                                                                                                                                                                                                                                                                                                                                                                                                                                                                                                                                                                                                                                                                                                                                                                                                                                                                                                                              | phs000993 |
| IPF             | Whole Genome Sequencing in Familial and Sporadic Idiopathic Pulmonary Fibrosis | David Schwartz<br><David.Schwartz@ucdenver.edu><br><br>Tasha Fingerlin<br><fingerlint@njhealth.org> | Please contact the study PI.                                                                                                                                                                                                                                                                                                                                                                                                                                                                                                                                                                                                                                                                                                                                                                                                                                                                                                                                                                                                                                                                                                                                                                                                                                                            | phs001607 |
| JHS             | Jackson Heart Study                                                            | April Carson<br><apcarson@umc.edu><br><br>Laura Raffield                                            | The Jackson Heart Study (JHS) is supported and conducted in collaboration with Jackson State University (HHSN268201800013I), Tougaloo College (HHSN268201800014I), the Mississippi State Department of                                                                                                                                                                                                                                                                                                                                                                                                                                                                                                                                                                                                                                                                                                                                                                                                                                                                                                                                                                                                                                                                                  | phs000964 |



|          |                                          |                                                                                      |                                                                                                                                                                                                                                                                                                                                                                                                                                                                                                                                                                                                                                                                                                                                                                                                                                                                                                                                                                                                                                                                                                                                                                                                                                                                      |           |
|----------|------------------------------------------|--------------------------------------------------------------------------------------|----------------------------------------------------------------------------------------------------------------------------------------------------------------------------------------------------------------------------------------------------------------------------------------------------------------------------------------------------------------------------------------------------------------------------------------------------------------------------------------------------------------------------------------------------------------------------------------------------------------------------------------------------------------------------------------------------------------------------------------------------------------------------------------------------------------------------------------------------------------------------------------------------------------------------------------------------------------------------------------------------------------------------------------------------------------------------------------------------------------------------------------------------------------------------------------------------------------------------------------------------------------------|-----------|
|          |                                          | <raffield@email.unc.edu>                                                             | <p>Health (HHSN268201800015I) and the University of Mississippi Medical Center (HHSN268201800010I, HHSN268201800011I and HHSN268201800012I) contracts from the National Heart, Lung, and Blood Institute (NHLBI) and the National Institute for Minority Health and Health Disparities (NIMHD). The authors also wish to thank the staffs and participants of the JHS.</p> <p>The views expressed in this manuscript are those of the authors and do not necessarily represent the views of the National Heart, Lung, and Blood Institute; the National Institutes of Health; or the U.S. Department of Health and Human Services.</p>                                                                                                                                                                                                                                                                                                                                                                                                                                                                                                                                                                                                                               |           |
| Mayo_VTE | Mayo Clinic Venous Thromboembolism Study | Mariza de Andrade<br><mandrade@mayo.edu>                                             | Funded, in part, by grants from the National Institutes of Health, National Heart, Lung and Blood Institute (HL66216 and HL83141), the National Human Genome Research Institute (HG04735, HG06379), and research support provided by Mayo Foundation.                                                                                                                                                                                                                                                                                                                                                                                                                                                                                                                                                                                                                                                                                                                                                                                                                                                                                                                                                                                                                | phs001402 |
| MESA     | Multi-Ethnic Study of Atherosclerosis    | Jerome Rotter<br><jrotter@lundquist.org><br><br>Stephen Rich<br><ssr4n@virginia.edu> | Whole genome sequencing (WGS) for the Trans-Omics in Precision Medicine (TOPMed) program was supported by the National Heart, Lung and Blood Institute (NHLBI). WGS for “NHLBI TOPMed: Multi-Ethnic Study of Atherosclerosis (MESA)” (phs001416.v1.p1) was performed at the Broad Institute of MIT and Harvard (3U54HG003067-13S1). Centralized read mapping and genotype calling, along with variant quality metrics and filtering were provided by the TOPMed Informatics Research Center (3R01HL-117626-02S1). Phenotype harmonization, data management, sample-identity QC, and general study coordination, were provided by the TOPMed Data Coordinating Center (3R01HL-120393-02S1), and TOPMed MESA Multi-Omics (HHSN268201500003I/HSN26800004). The MESA projects are conducted and supported by the National Heart, Lung, and Blood Institute (NHLBI) in collaboration with MESA investigators. Support for the Multi-Ethnic Study of Atherosclerosis (MESA) projects are conducted and supported by the National Heart, Lung, and Blood Institute (NHLBI) in collaboration with MESA investigators. Support for MESA is provided by contracts 75N92020D00001, HHSN268201500003I, N01-HC-95159, 75N92020D00005, N01-HC-95160, 75N92020D00002, N01-HC-95161, | phs001416 |

|         |                                                                     |                                                                                                      |                                                                                                                                                                                                                                                                                                                                                                                                                                                                                                                                                                                                                                                                                                                                                    |           |
|---------|---------------------------------------------------------------------|------------------------------------------------------------------------------------------------------|----------------------------------------------------------------------------------------------------------------------------------------------------------------------------------------------------------------------------------------------------------------------------------------------------------------------------------------------------------------------------------------------------------------------------------------------------------------------------------------------------------------------------------------------------------------------------------------------------------------------------------------------------------------------------------------------------------------------------------------------------|-----------|
|         |                                                                     |                                                                                                      | 75N92020D00003, N01-HC-95162, 75N92020D00006, N01-HC-95163, 75N92020D00004, N01-HC-95164, 75N92020D00007, N01-HC-95165, N01-HC-95166, N01-HC-95167, N01-HC-95168, N01-HC-95169, UL1-TR-000040, UL1-TR-001079, UL1-TR-001420, UL1TR001881, DK063491, and R01HL105756. The authors thank the other investigators, the staff, and the participants of the MESA study for their valuable contributions. A full list of participating MESA investigators and institutes can be found at <a href="http://www.mesa-nhlbi.org">http://www.mesa-nhlbi.org</a> .                                                                                                                                                                                             |           |
| MPP     | Malmo Preventative Project                                          | Gustav Smith<br><gustav@broadinstitute.org>                                                          | J. Gustav Smith was supported by grants from the Swedish Heart-Lung Foundation (2016-0134, 2016-0315 and 2019-0526), the Swedish Research Council (2017-02554), the European Research Council (ERC-STG-2015-679242), the Crafoord Foundation, Skåne University Hospital, the Scania county, governmental funding of clinical research within the Swedish National Health Service, a generous donation from the Knut and Alice Wallenberg foundation to the Wallenberg Center for Molecular Medicine in Lund, and funding from the Swedish Research Council (Linnaeus grant Dnr 349-2006-237, Strategic Research Area Exodiab Dnr 2009-1039) and Swedish Foundation for Strategic Research (Dnr IRC15-0067) to the Lund University Diabetes Center. | phs001544 |
| OMG_SCD | Outcome Modifying Genes in Sickle Cell Disease                      | Allison Ashley-Koch<br><allison.ashleykoch@duke.edu><br>Marilyn Telen<br><marilyn.telen@duke.edu>    | The OMG-SCD study was administrated by Marilyn J. Telen, M.D. and Allison E. Ashley-Koch, Ph.D. from Duke University Medical Center and collection of the data set was supported by grants HL068959, HL079915, R01HL68959, HL70769, HL87681 from the National Heart, Lung, and Blood Institute (NHLBI) of the National Institute of Health (NIH).                                                                                                                                                                                                                                                                                                                                                                                                  | phs001608 |
| PMBB_AF | Early-onset Atrial Fibrillation in the Penn Medicine BioBank Cohort | Daniel Rader<br><rader@mail.med.upenn.edu><br>><br>Scott Damrauer<br><Scott.Damrauer@uphs.upenn.edu> | The Penn Medicine BioBank is funded by a gift from the Smilow family, the National Center for Advancing Translational Sciences of the National Institutes of Health under CTSA Award Number UL1TR001878, and the Perelman School of Medicine at the University of Pennsylvania.<br><br>SMD is supported by IK2-CX001780. This publication does not represent the views of the Department of Veterans Affairs or the United States Government.                                                                                                                                                                                                                                                                                                      | phs001601 |

|                 |                                                                                                               |                                                                                 |                                                                                                                                                                                                                                                                                                                                                                                                                                                                                                                                                                                                                                                                                                                                                                                                                                                                                                                                                                                                                                                                                                                                                                                                                            |           |
|-----------------|---------------------------------------------------------------------------------------------------------------|---------------------------------------------------------------------------------|----------------------------------------------------------------------------------------------------------------------------------------------------------------------------------------------------------------------------------------------------------------------------------------------------------------------------------------------------------------------------------------------------------------------------------------------------------------------------------------------------------------------------------------------------------------------------------------------------------------------------------------------------------------------------------------------------------------------------------------------------------------------------------------------------------------------------------------------------------------------------------------------------------------------------------------------------------------------------------------------------------------------------------------------------------------------------------------------------------------------------------------------------------------------------------------------------------------------------|-----------|
|                 |                                                                                                               |                                                                                 | Dr. Damrauer had research support to University of Pennsylvania from RenalytixAI and personal fees from Calico Labs, both outside the current work.                                                                                                                                                                                                                                                                                                                                                                                                                                                                                                                                                                                                                                                                                                                                                                                                                                                                                                                                                                                                                                                                        |           |
| REDS-III-Brazil | Recipient Epidemiology and Donor Evaluation Study-III                                                         | Custer, Brian <BCuster@vitalant.org>; Kelly, Shannon <shannon.kelly@ucsf.edu>   | REDS-III was supported by the National Heart, Lung, and Blood Institute (NHLBI) HHSN268201100007I.                                                                                                                                                                                                                                                                                                                                                                                                                                                                                                                                                                                                                                                                                                                                                                                                                                                                                                                                                                                                                                                                                                                         | phs001468 |
| SAFS            | Whole Genome Sequencing to Identify Causal Genetic Variants Influencing CVD Risk - San Antonio Family Studies | John Blangero <john.blangero@utrgv.edu> Joanne Curran <joanne.curran@utrgv.edu> | This research was supported by National Institutes of Health grant R01 HL113323.                                                                                                                                                                                                                                                                                                                                                                                                                                                                                                                                                                                                                                                                                                                                                                                                                                                                                                                                                                                                                                                                                                                                           | phs001215 |
| Sarcoidosis     | Genetics of Sarcoidosis in African Americans                                                                  | Courtney Montgomery <Courtney-Montgomery@omrf.org>                              | This research was supported by National Institutes of Health (R01HL113326, P30 GM110766-01)                                                                                                                                                                                                                                                                                                                                                                                                                                                                                                                                                                                                                                                                                                                                                                                                                                                                                                                                                                                                                                                                                                                                | phs001207 |
| SARP            | Severe Asthma Research Program                                                                                | Deborah A Meyers <dameyers@email.arizona.edu>                                   | Please contact the study PI.                                                                                                                                                                                                                                                                                                                                                                                                                                                                                                                                                                                                                                                                                                                                                                                                                                                                                                                                                                                                                                                                                                                                                                                               | phs001446 |
| walk_PHaSST     | Treatment of Pulmonary Hypertension and Sickle Cell Disease with Sildenafil Therapy                           | Mark Gladwin <gladwinmt@upmc.edu> Yingze Zhang <zhanyx@UPMC.EDU>                | We thank the investigators of the Walk-PHasst study and the patients who participated in the study. We also thanks the walk-PHaSST clinical site team: Albert Einstein College of Medicine: Jane Little and Verlene Davis; Columbia University: Robyn Barst, Erika Rosenzweig, Margaret Lee and Daniela Brady; UCSF Benioff Children's Hospital Oakland: Claudia Morris, Ward Hagar, Lisa Lavrisha, Howard Rosenfeld, and Elliott Vichinsky; Children's Hospital of Pittsburgh of UPMC: Regina McCollum; Hammersmith Hospital, London: Sally Davies, Gaia Mahalingam, Sharon Meehan, Ofelia Lebanto, and Ines Cabrita; Howard University: Victor Gordeuk, Oswaldo Castro, Onyinye Onyekwere, Vandana Sachdev, Alvin Thomas, Gladys Onojobi, Sharmin Diaz, Margaret Fadojutimi-Akinsiku, and Randa Aladdin; Johns Hopkins University: Reda Girgis, Sophie Lanzkron and Durrant Barasa; NHLBI: Mark Gladwin, Greg Kato, James Taylor, Wynona Coles, Catherine Seamon, Mary Hall, Amy Chi, Cynthia Brenneman, Wen Li, and Erin Smith; University of Colorado: Kathryn Hassell, David Badesch, Deb McCollister and Julie McAfee; University of Illinois at Chicago: Dean Schraufnagel, Robert Molokie, George Kondos, Patricia | phs001514 |

|     |                           |                                                                                                                                                                                                                                     |                                                                                                                                                                                                                                                                                                                                                                                                                                                                                                                                                                                                                                                                                                                                                                                                                                                     |           |
|-----|---------------------------|-------------------------------------------------------------------------------------------------------------------------------------------------------------------------------------------------------------------------------------|-----------------------------------------------------------------------------------------------------------------------------------------------------------------------------------------------------------------------------------------------------------------------------------------------------------------------------------------------------------------------------------------------------------------------------------------------------------------------------------------------------------------------------------------------------------------------------------------------------------------------------------------------------------------------------------------------------------------------------------------------------------------------------------------------------------------------------------------------------|-----------|
|     |                           |                                                                                                                                                                                                                                     | <p>Cole-Saffold, and Lani Krauz; National Heart &amp; Lung Institute, Imperial College London: Simon Gibbs. Thanks also to the data coordination center team from Rho, Inc.: Nancy Yovetich, Rob Woolson, Jamie Spencer, Christopher Woods, Karen Kesler, Vickie Coble, and Ronald W. Helms. We also thank Dr. Yingze Zhang for directing the Walk-PHasst repository and Dr. Mehdi Nouraiie for maintaining the Walk-PHasst database and Dr. Jonathan Goldsmith as a NIH program director for this study. Special thanks to the volunteers who participated in the Walk-PHaSST study. This project was funded with federal funds from the NHLBI, NIH, Department of Health and Human Services, under contract HHSN268200617182C. This study is registered at <a href="http://www.clinicaltrials.gov">www.clinicaltrials.gov</a> as NCT00492531.</p> |           |
| WHI | Women's Health Initiative | <p>Charles Kooperberg<br/>&lt;clk@fredhutch.org&gt;<br/>Alex Reiner<br/><a href="mailto:apreiner@uw.edu">apreiner@uw.edu</a><br/>Jeffrey Haessler<br/>&lt;jhaessle@whi.org&gt;<br/>Sean David<br/>&lt;spdavid1@uchicago.edu&gt;</p> | <p>The WHI program is funded by the National Heart, Lung, and Blood Institute, National Institutes of Health, U.S. Department of Health and Human Services through contracts HHSN268201600018C, HHSN268201600001C, HHSN268201600002C, HHSN268201600003C, and HHSN268201600004C.</p>                                                                                                                                                                                                                                                                                                                                                                                                                                                                                                                                                                 | phs001237 |

#### Supplementary Note 4. TOPMed Omics Support Table

| TOPMed Accession # | TOPMed Study Short Name | TOPMed Phase | TOPMed Project | Omics Center Short Name | Omics Support                         | Omics Type |
|--------------------|-------------------------|--------------|----------------|-------------------------|---------------------------------------|------------|
| phs001211          | ARIC                    | 2            | VTE            | Baylor                  | 3U54HG003273-12S2 / HSN268201500015C  | WGS        |
| phs001143          | BAGS                    | 1            | BAGS           | Illumina                | 3U54HG003273-12S2 / HHSN268201500015C | WGS        |
| phs001644          | BioMe                   | 3            | BioMe          | Baylor                  | HHSN268201600033I                     | WGS        |
| phs001644          | BioMe                   | 3            | BioMe          | MGI                     | HHSN268201600037I                     | WGS        |
| phs001612          | CARDIA                  | 3            | CARDIA         | Baylor                  | HHSN268201600033I                     | WGS        |
| phs000954          | CFS                     | 1            | CFS            | NWGC                    | 3R01HL098433-05S1                     | WGS        |
| phs000954          | CFS                     | 3.5          | CFS            | NWGC                    | HHSN268201600032I                     | WGS        |
| phs001368          | CHS                     | 3            | CHS            | Baylor                  | HHSN268201600033I                     | WGS        |
| phs001368          | CHS VTE                 | 2            | VTE            | Baylor                  | 3U54HG003273-12S2 / HHSN268201500015C | WGS        |
| phs000951          | COPDGene                | 2.5          | COPD           | Broad Genomics          | HHSN268201500014C                     | WGS        |
| phs000951          | COPDGene                | 1            | COPD           | NWGC                    | 3R01HL089856-08S1                     | WGS        |
| phs000951          | COPDGene                | 2            | COPD           | Broad Genomics          | HHSN268201500014C                     | WGS        |
| phs001412          | DHS                     | 2            | AA_CAC         | Broad Genomics          | HHSN268201500014C                     | WGS        |
| phs001472          | ECLIPSE                 | 3            | ECLIPSE        | MGI                     | HHSN268201600037I                     | WGS        |

|           |              |        |                |                |                   |     |
|-----------|--------------|--------|----------------|----------------|-------------------|-----|
| phs000946 | EOCOPD       | 1      | COPD           | NWGC           | 3R01HL089856-08S1 | WGS |
| phs000974 | FHS          | 1      | FHS            | Broad Genomics | 3U54HG003067-12S2 | WGS |
| phs001218 | GeneSTAR     | legacy | GeneSTAR       | Illumina       | R01HL112064       | WGS |
| phs001218 | GeneSTAR     | 2      | GeneSTAR       | Psomagen       | 3R01HL112064-04S1 | WGS |
| phs001218 | GeneSTAR     | 2      | AA_CAC         | Broad Genomics | HHSN268201500014C | WGS |
| phs001345 | GENOA        | 2      | HyperGEN_GENOA | NWGC           | 3R01HL055673-18S1 | WGS |
| phs001345 | GENOA_AA_CAC | 2      | AA_CAC         | Broad Genomics | HHSN268201500014C | WGS |
| phs001359 | GOLDN        | 2      | GOLDN          | NWGC           | 3R01HL104135-04S1 | WGS |
| phs001395 | HCHS_SOL     | 3      | HCHS_SOL       | Baylor         | HHSN268201600033I | WGS |
| phs001293 | HyperGEN     | 2      | HyperGEN_GENOA | NWGC           | 3R01HL055673-18S1 | WGS |
| phs000993 | HVH          | 1      | AFGen          | Broad Genomics | 3R01HL092577-06S1 | WGS |
| phs001607 | IPF          | 3      | IPF            | MGI            | HHSN268201600037I | WGS |
| phs000964 | JHS          | 1      | JHS            | NWGC           | HHSN268201100037C | WGS |
| phs001416 | MESA_AA_CAC  | 2      | AA_CAC         | Broad Genomics | HHSN268201500014C | WGS |
| phs001544 | MPP          | 2.4    | AFGen          | Broad Genomics | 3UM1HG008895-01S2 | WGS |
| phs001608 | OMG_SCD      | 2      | OMG_SCD        | Baylor         | HHSN268201500015C | WGS |
| phs001608 | OMG_SCD      | 7.1    | OMG_SCD        | Baylor         | HHSN268201600033I | WGS |

|           |                 |          |                 |                |                                      |     |
|-----------|-----------------|----------|-----------------|----------------|--------------------------------------|-----|
| phs001601 | PMBB_AF         | 2.4      | AFGen           | Broad Genomics | 3UM1HG008895-01S2                    | WGS |
| phs001468 | REDS-III_Brazil | 2        | REDS-III_Brazil | Baylor         | HHSN268201500015C                    | WGS |
| phs001468 | REDS-III_Brazil | 5.4      | REDS-III_Brazil | Baylor         | HHSN268201600033I                    | WGS |
| phs001215 | SAFS            | 1        | SAFS            | Illumina       | 3R01HL113323-03S1                    | WGS |
| phs001215 | SAFS            | legacy   | SAFS            | Illumina       | R01HL113322                          | WGS |
| phs001207 | Sarcoidosis     | 2        | Sarcoidosis     | Baylor         | 3R01HL113326-04S1                    | WGS |
| phs001207 | Sarcoidosis     | 3.5, 5.5 | Sarcoidosis     | NWGC           | HHSN268201600032I                    | WGS |
| phs001207 | Sarcoidosis     | 3.5, 5.5 | Sarcoidosis     | Broad Genomics | HHSN268201600034I                    | WGS |
| phs001446 | SARP            | 2        | SARP            | NYGC Genomics  | HHSN268201500016C                    | WGS |
| phs001402 | Mayo_VTE        | 2        | VTE             | Baylor         | 3U54HG003273-12S2 / HSN268201500015C | WGS |
| phs001514 | walk_PHaSST     | 2        | walk_PHaSST     | Baylor         | HHSN268201500015C                    | WGS |
| phs001237 | WHI             | 2        | WHI             | Broad Genomics | HHSN268201500014C                    | WGS |

**Supplementary Note 5. Full TOPMed Banner Authorship list**

Full TOPMed Banner authorship list can be found here: <https://www.nhlbiwgs.org/topmed-banner-authorship>



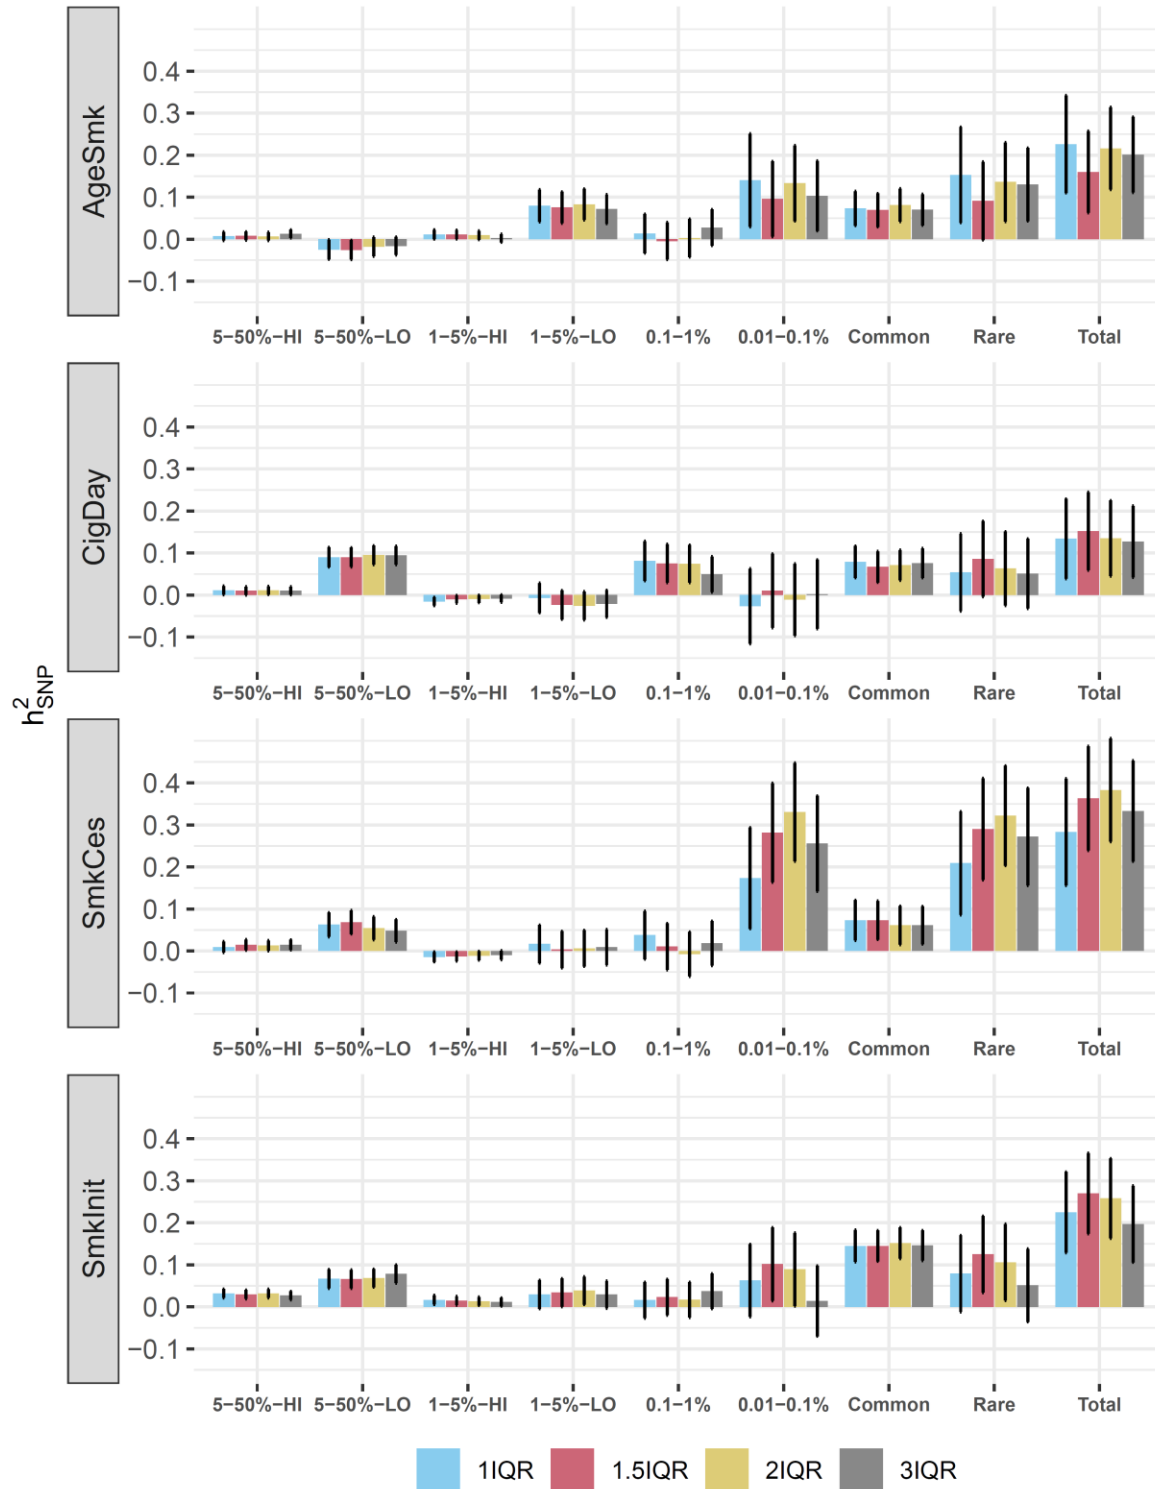

Supplementary Figure 1. SNP-based heritability estimates and standard errors from samples with increasingly less control of population structure with 1QQR being the most conservative and 3IQR being the most liberal. X-axis indicates LDMS bins and their sums (Common: a sum across 5-50%-HI, 5-50%-LO, 1-5%-HI, 1-5%-LO bins; Rare: a sum across 0.1-1%, 0.01-0.1% bins; Total: a sum across all six bins). “HI” and “LO” each means variants with high or low LD scores as determined by the median LD scores of each bin.

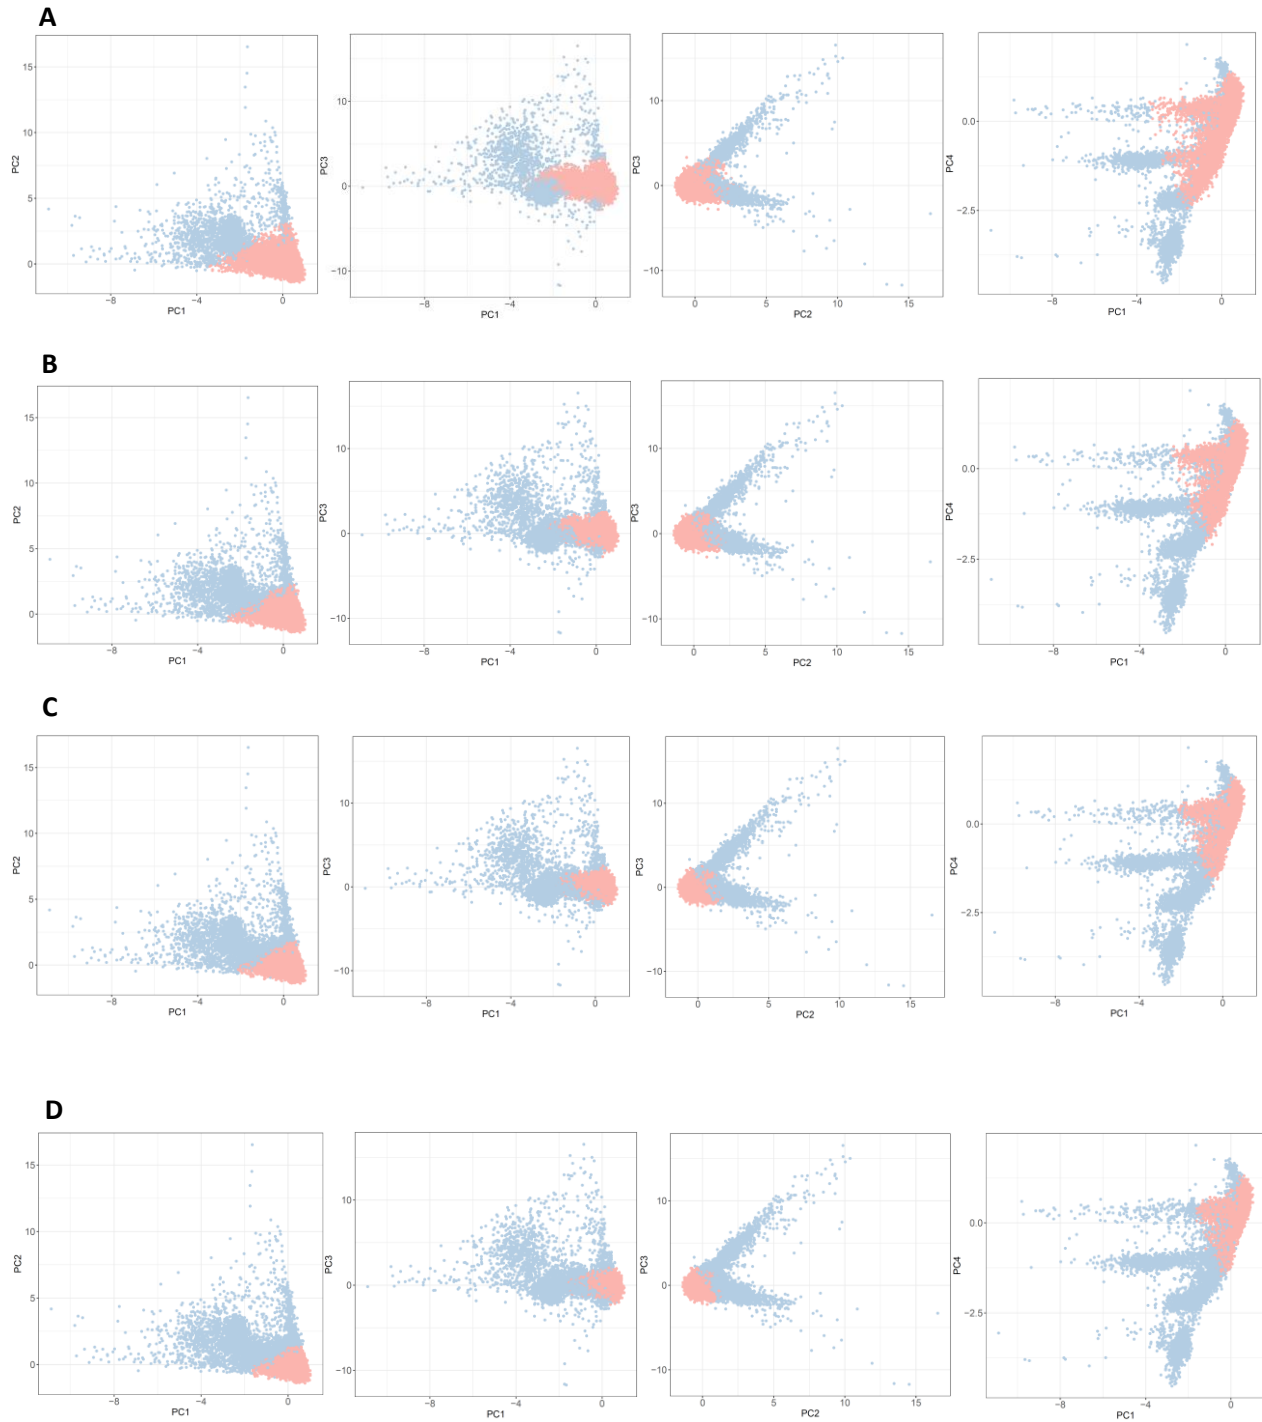

Supplementary Figure 2. Principal components 1-4 of four different IQR samples. A, B, C, D each shows samples lying inside the  $3 \cdot \text{IQR}$ ,  $2 \cdot \text{IQR}$ ,  $1.5 \cdot \text{IQR}$ , and  $1 \cdot \text{IQR}$  range of the sum of the Euclidian distance of the PC 1 to 4. Red and blue dots each indicate samples included and excluded, respectively.

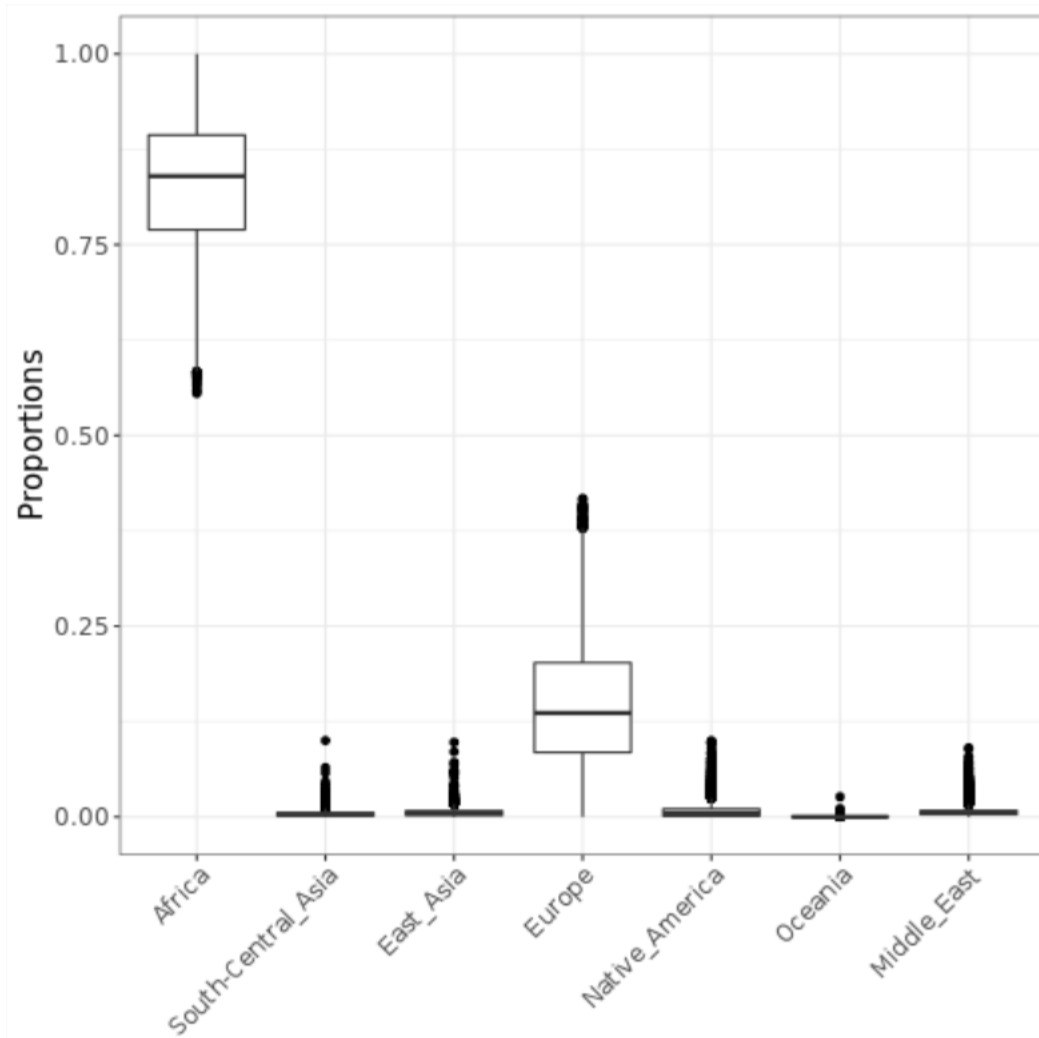

Supplementary Figure 3. Global ancestry proportions of African ancestry sample (N=11,743). Samples used in SmkInit analysis were shown here. Individuals whose ancestry proportions are above  $3Q + 1.5$  IQR or below  $1Q - 1.5$  IQR are shown in black dots.

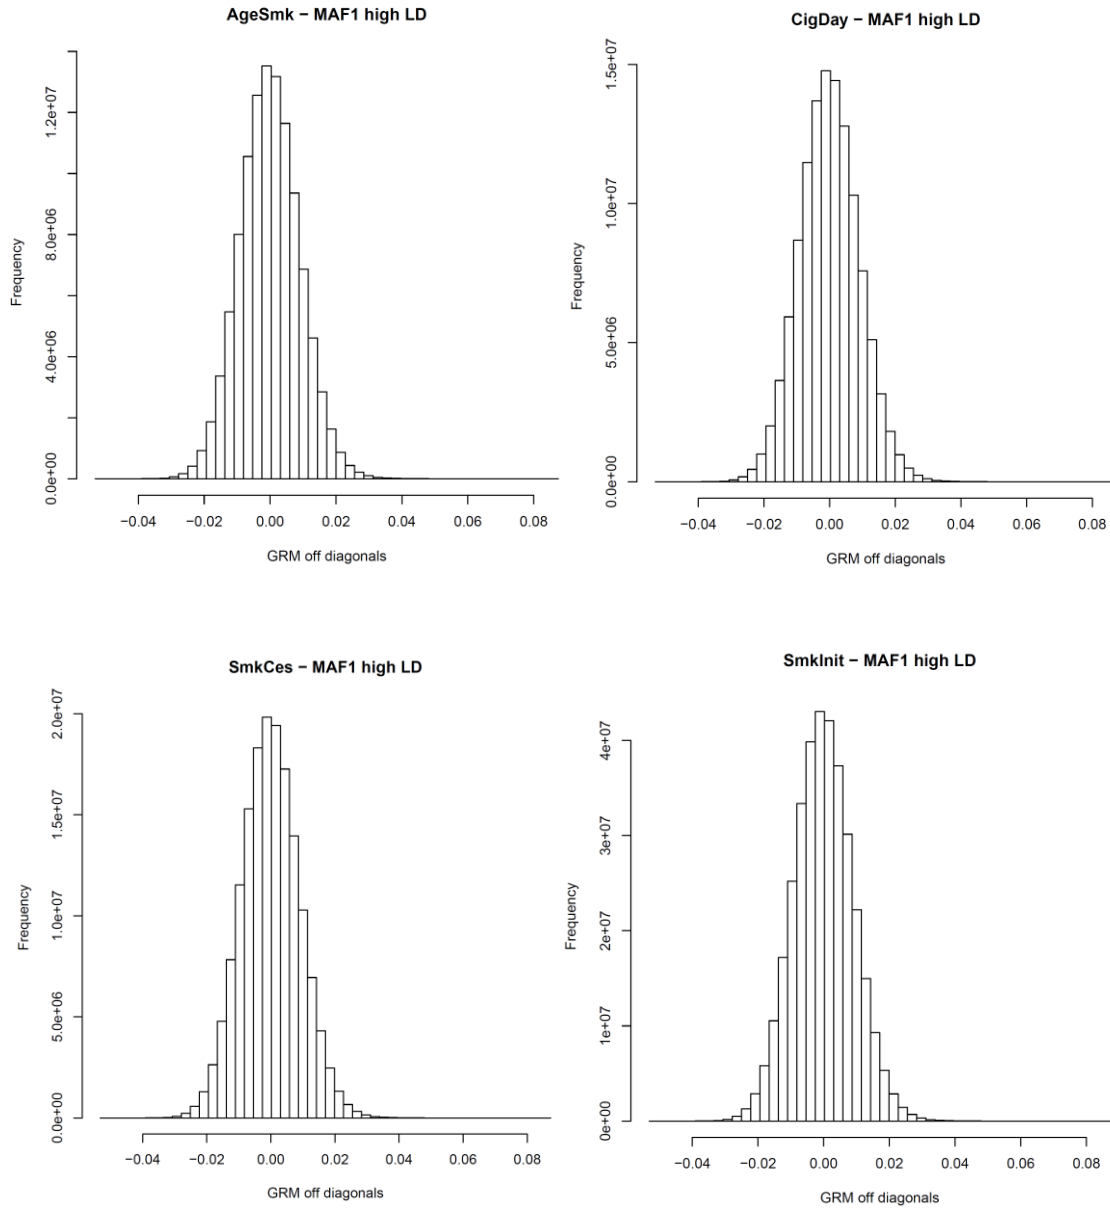

Supplementary Figure 4-1. Histogram of GRM off-diagonals from MAF 5-50% - high LD bin in European ancestry sample

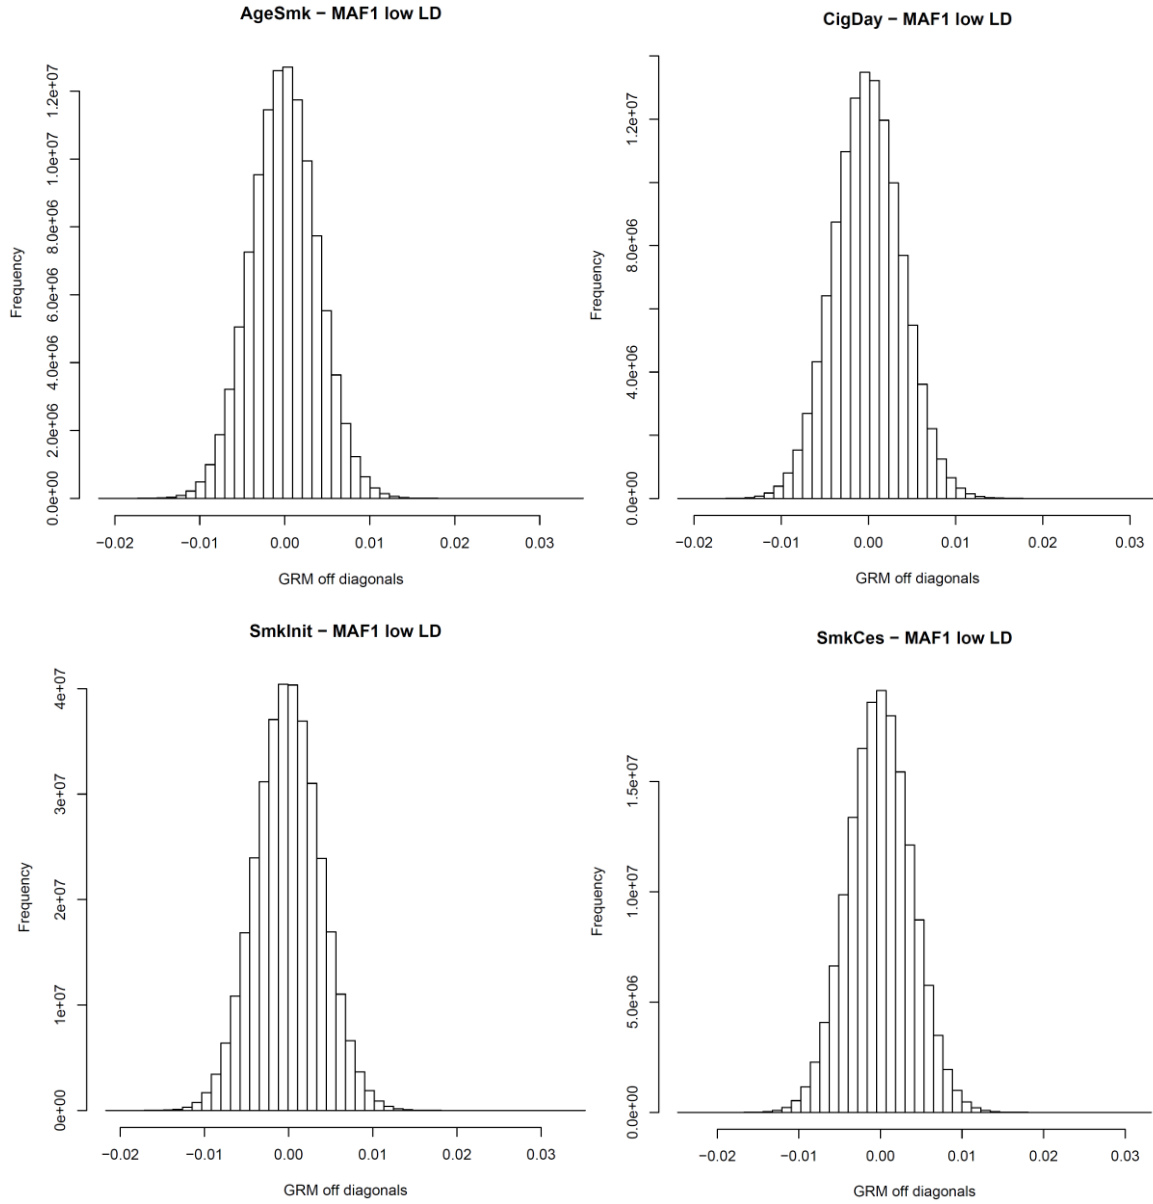

Supplementary Figure 4-2. Histogram of GRM off-diagonals from MAF 5-50% - low LD bin in European ancestry sample

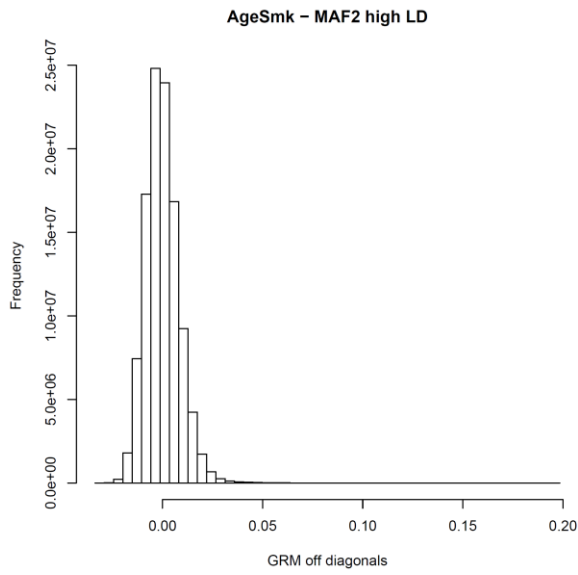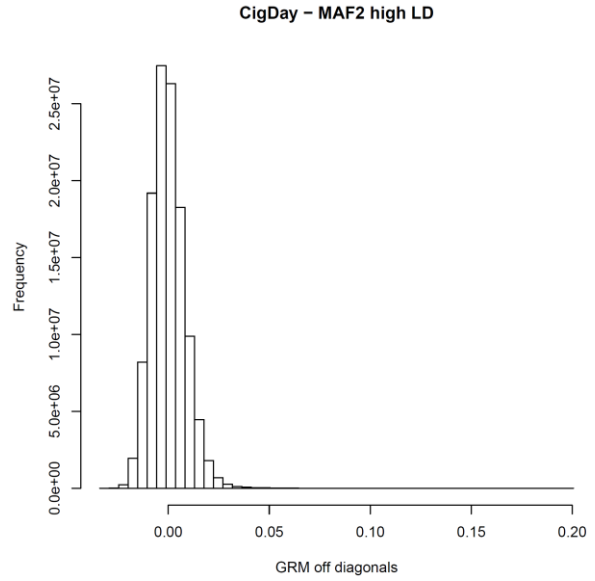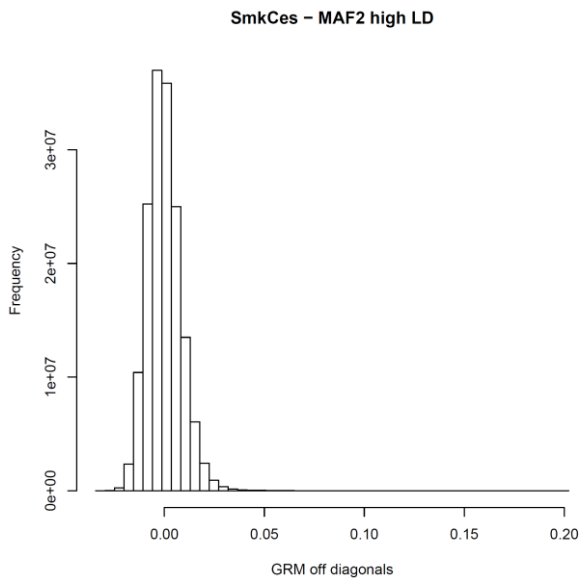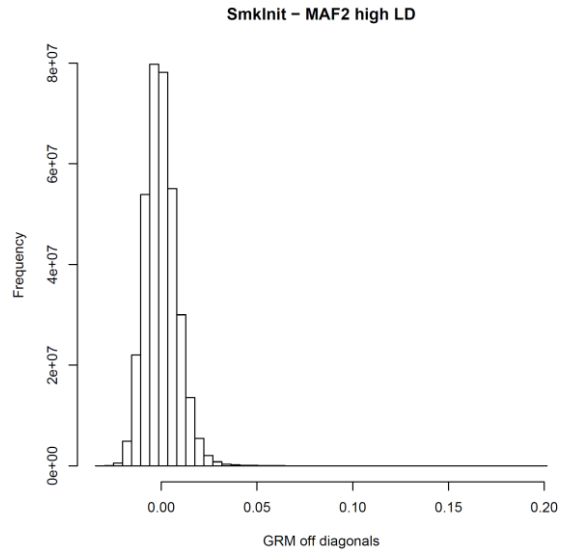

Supplementary Figure 4-3. Histogram of GRM off-diagonals from MAF 1-5% - high LD bin in European ancestry sample

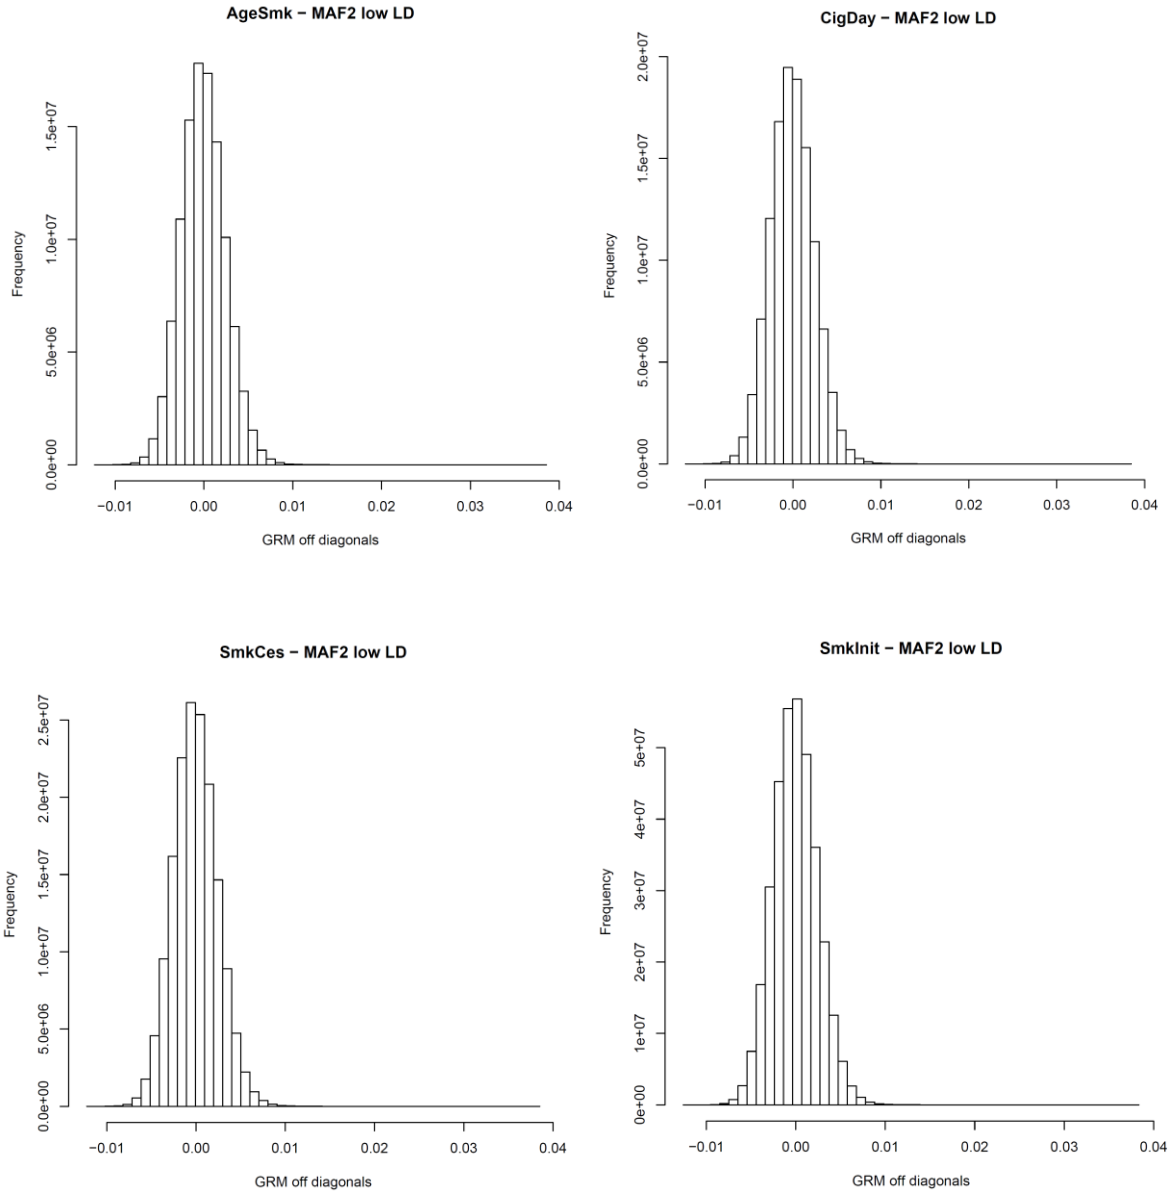

Supplementary Figure 4-4. Histogram of GRM off-diagonals from MAF 1-5% - low LD bin in European ancestry sample

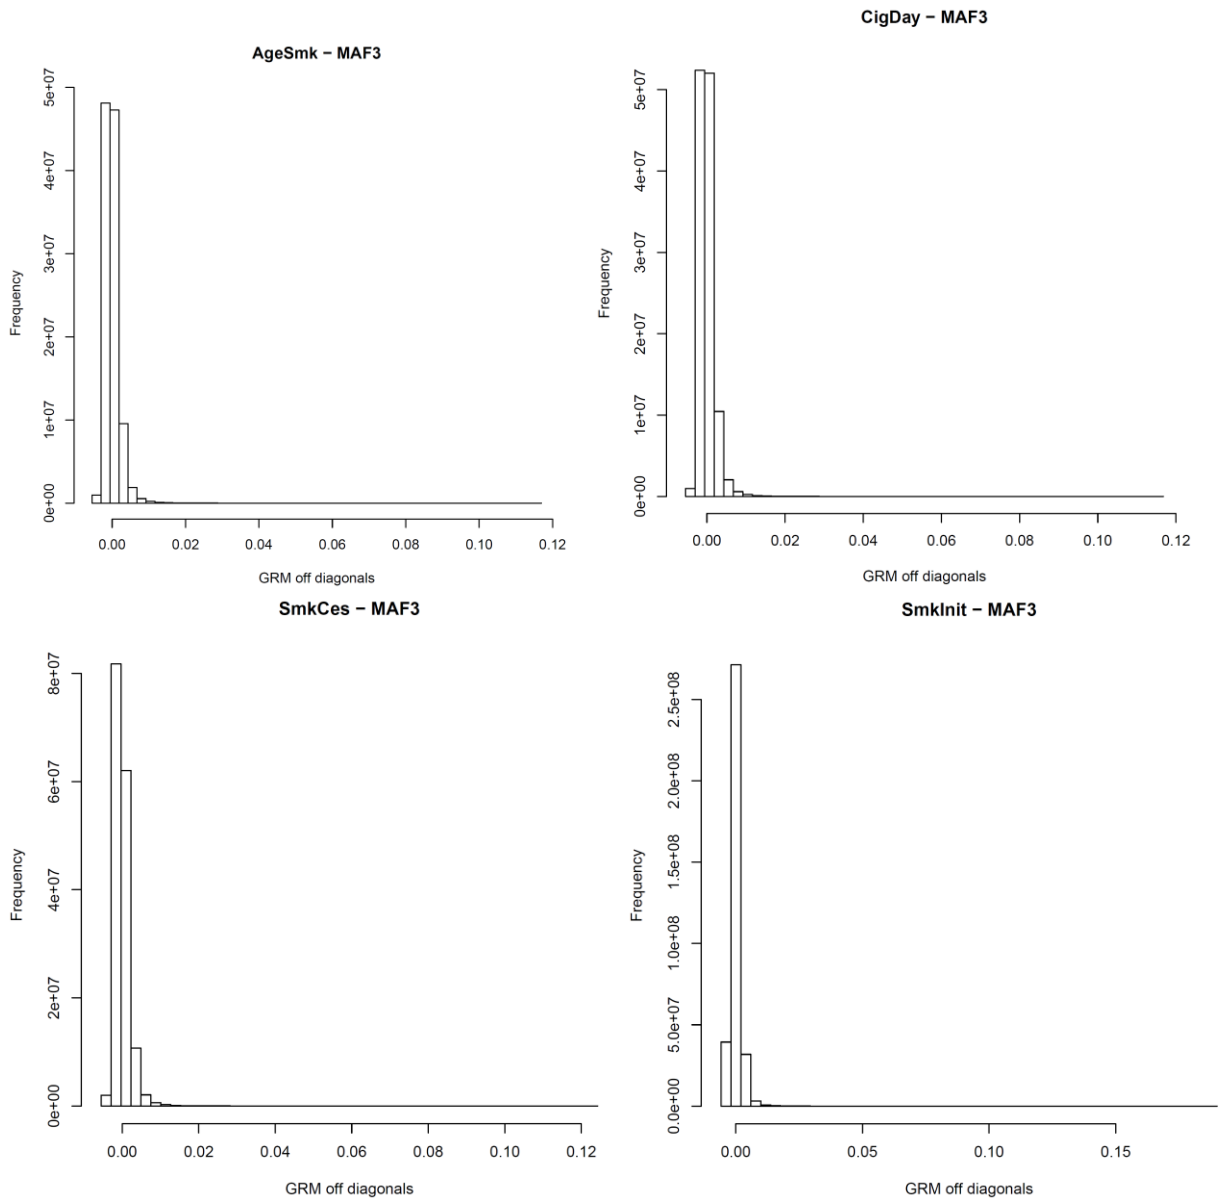

Supplementary Figure 4-5. Histogram of GRM off-diagonals from MAF 0.1-1% bin in European ancestry sample



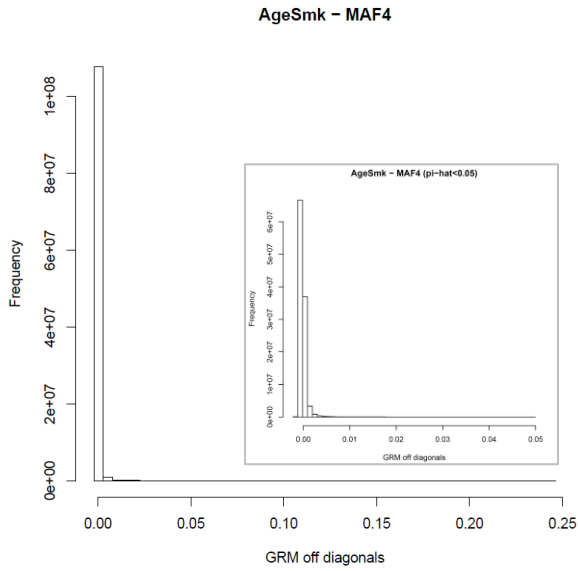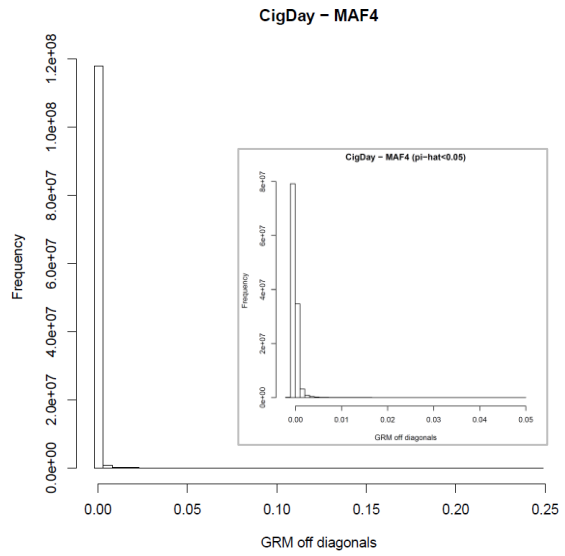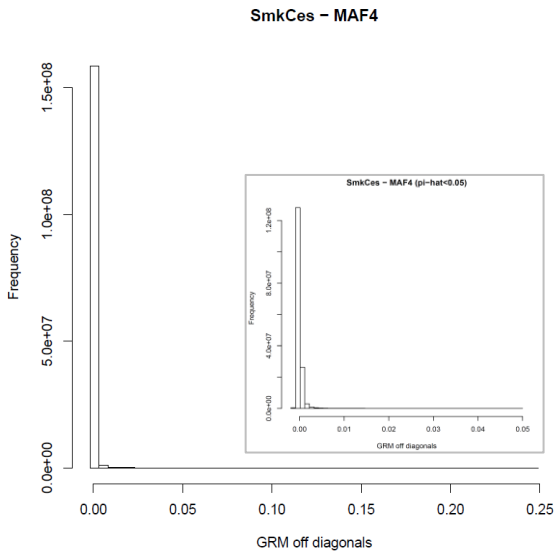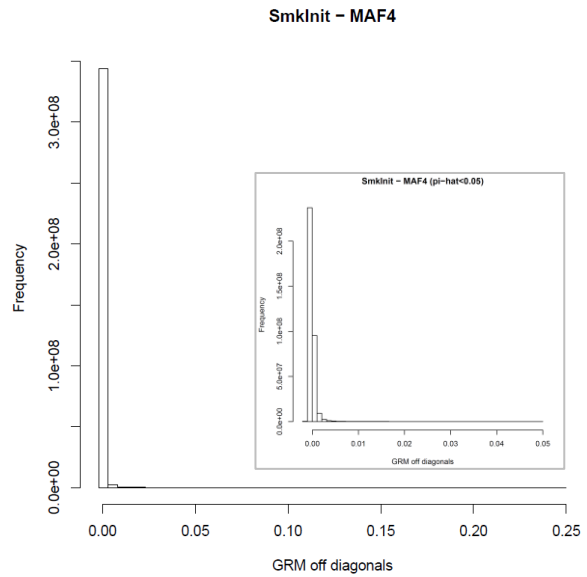

Supplementary Figure 4-6. Histogram of GRM off-diagonals from MAF 0.01-0.1% bin in European ancestry sample. Histograms of off-diagonals  $< 0.05$  were presented in a smaller box for finer scale distribution.

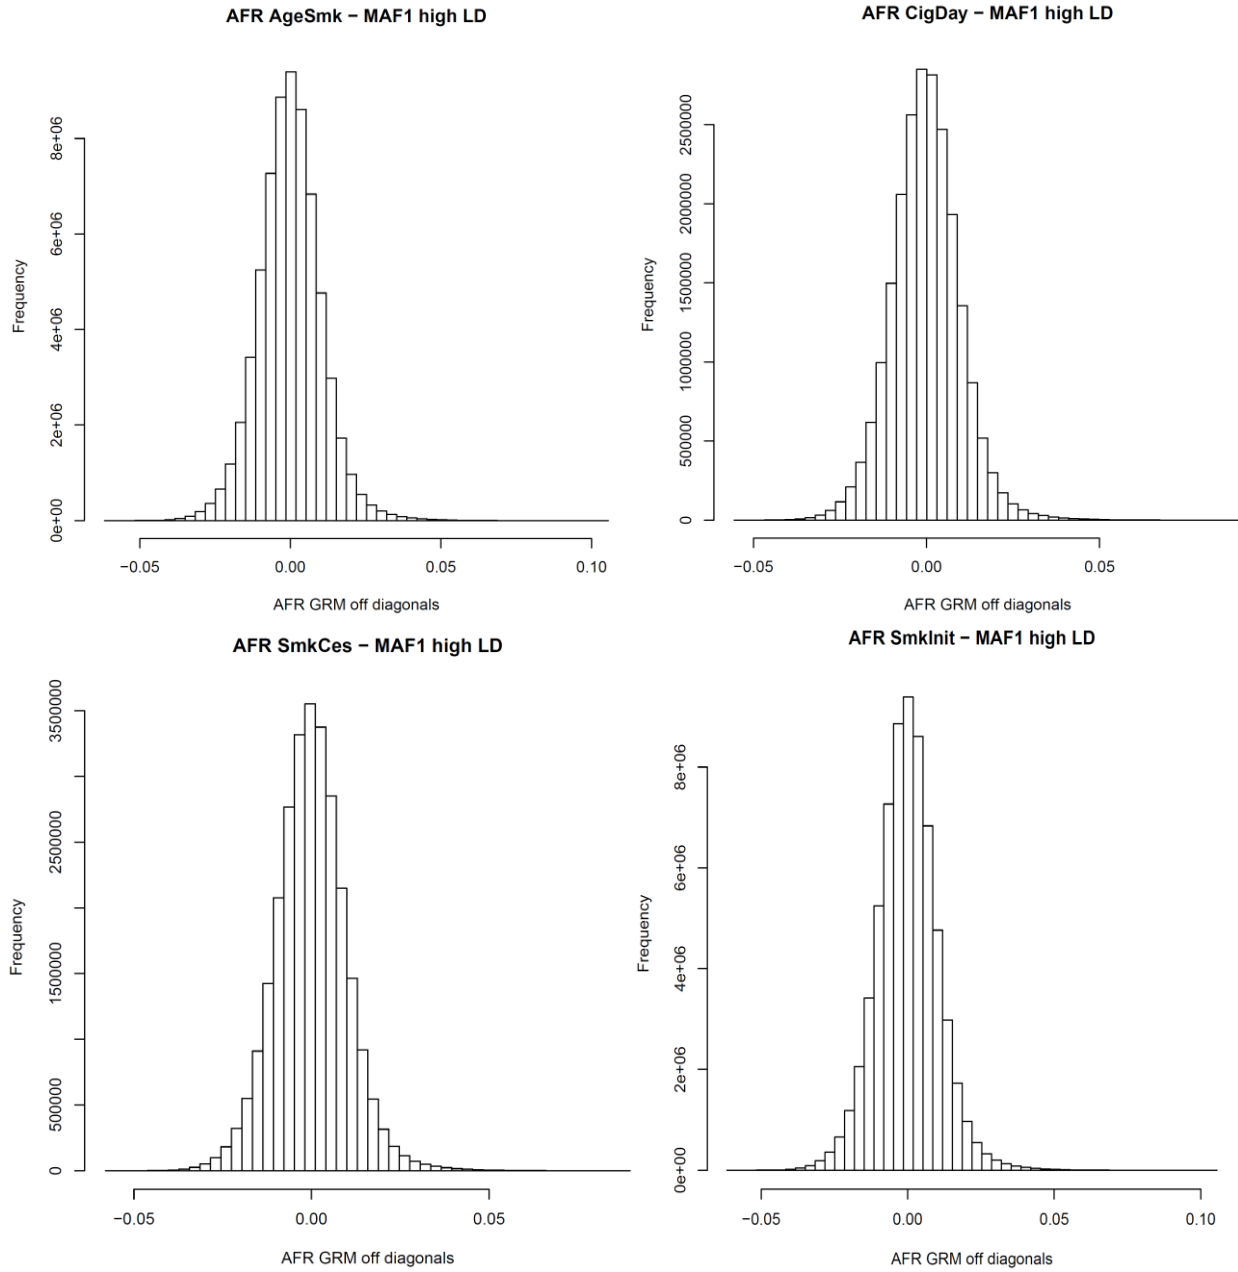

Supplementary Figure 5-1. Histogram of GRM off-diagonals from MAF 5-50% - high LD bin in African ancestry sample

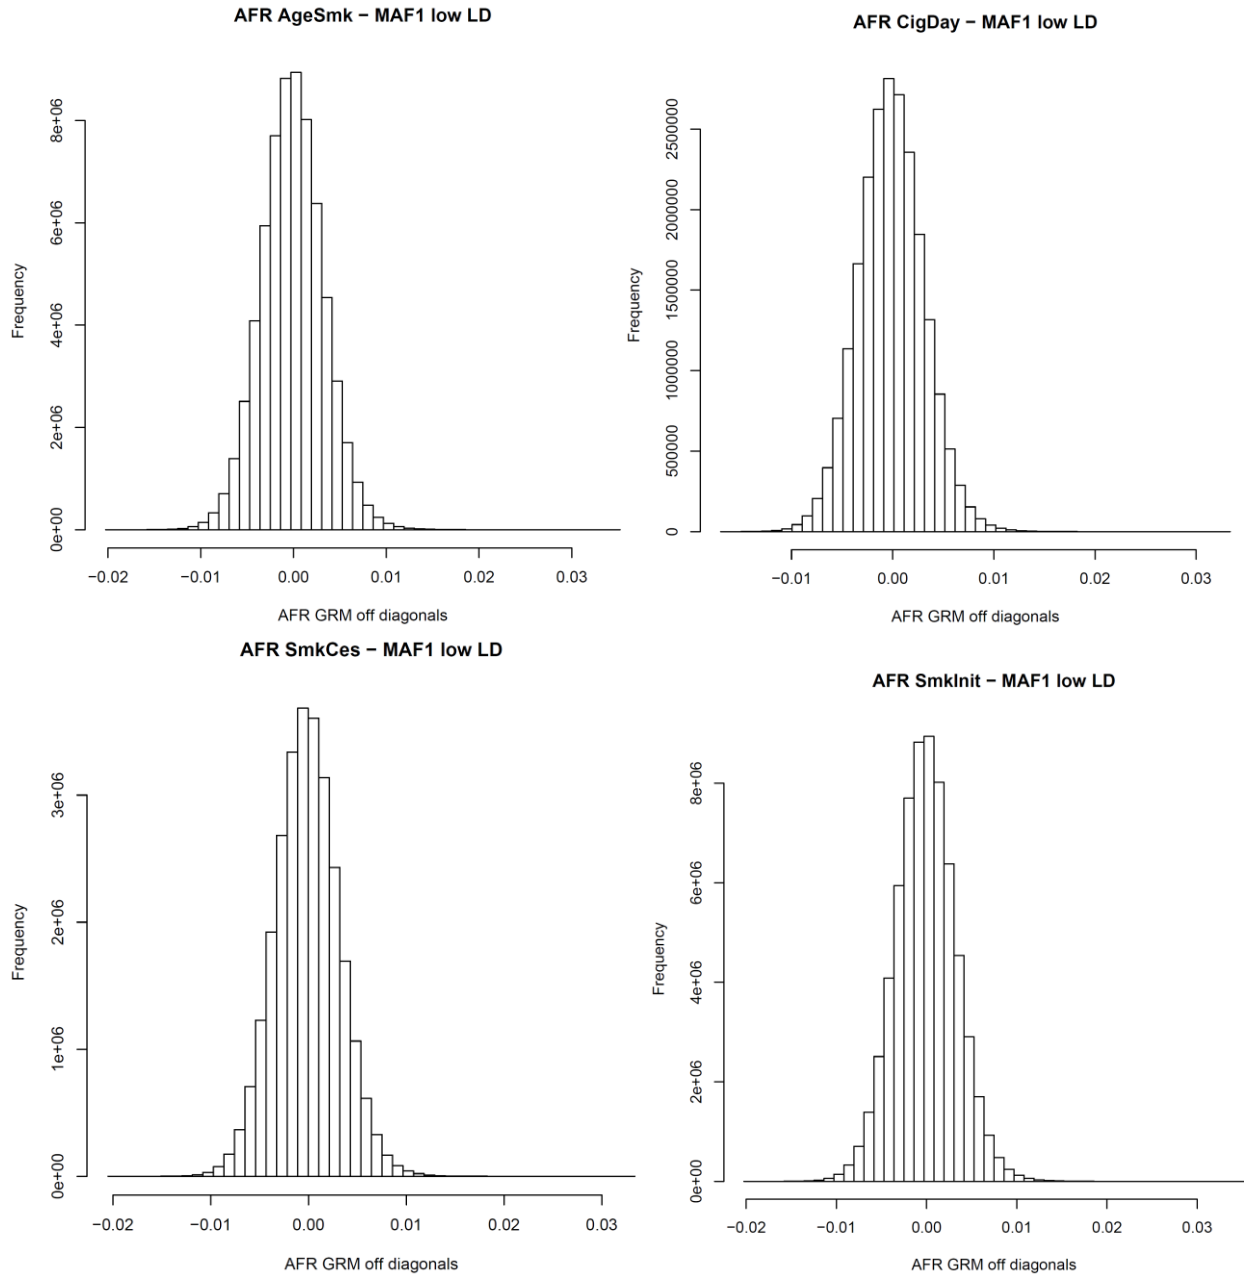

Supplementary Figure 5-2. Histogram of GRM off-diagonals from MAF 5-50% - low LD bin in African ancestry sample

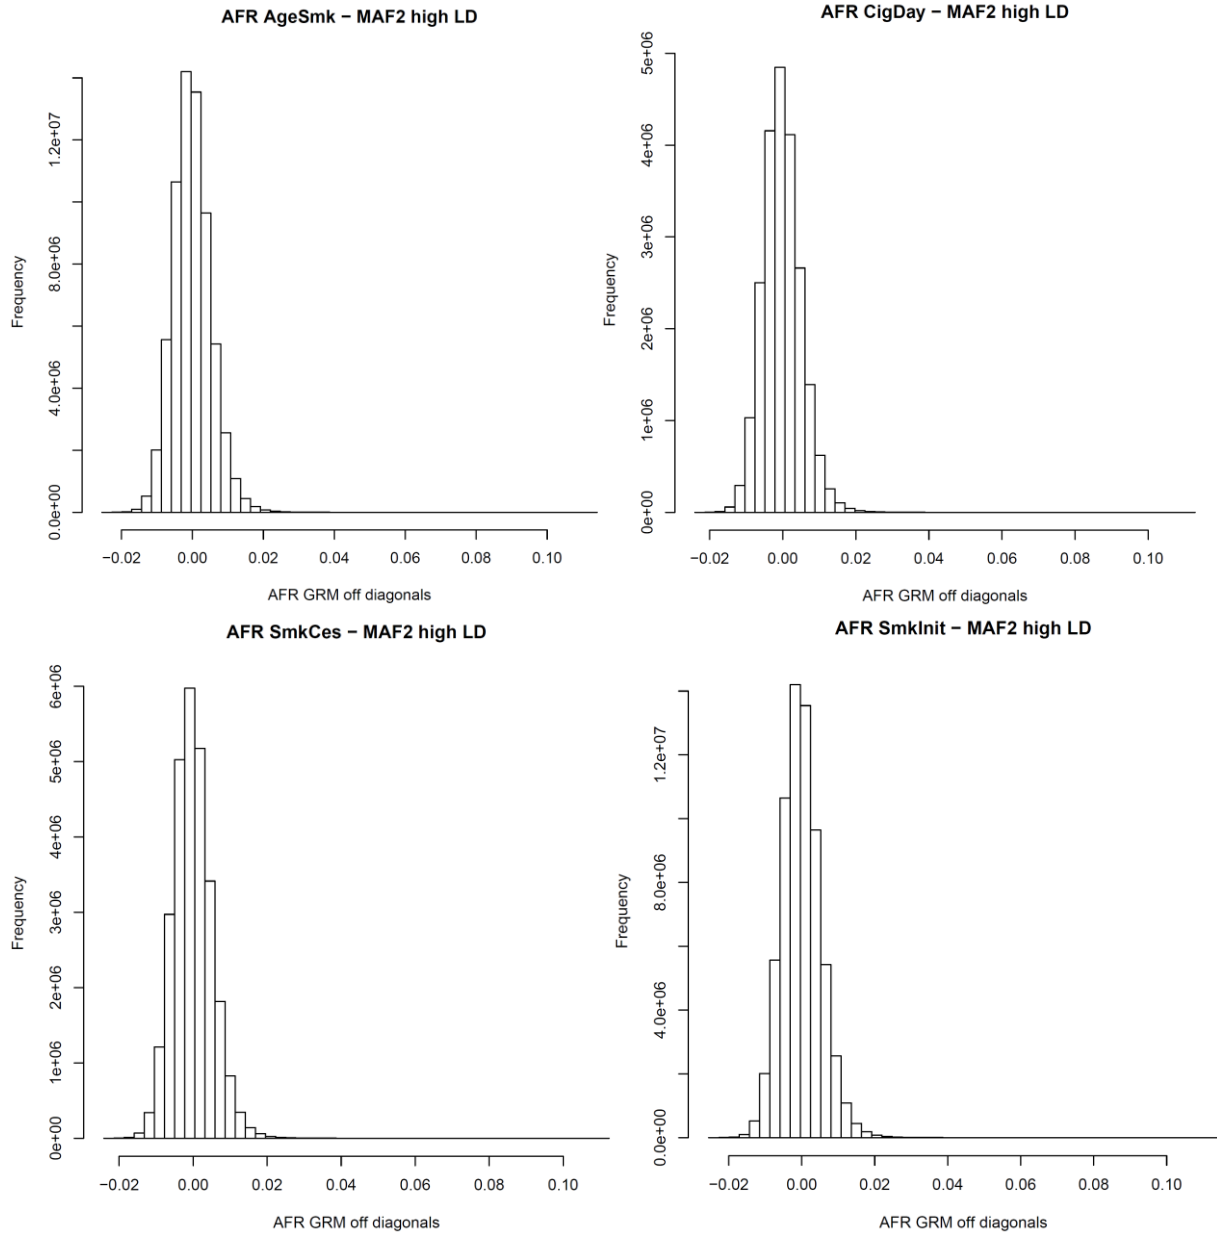

Supplementary Figure 5-3. Histogram of GRM off-diagonals from MAF 1-5% - high LD bin in African ancestry sample

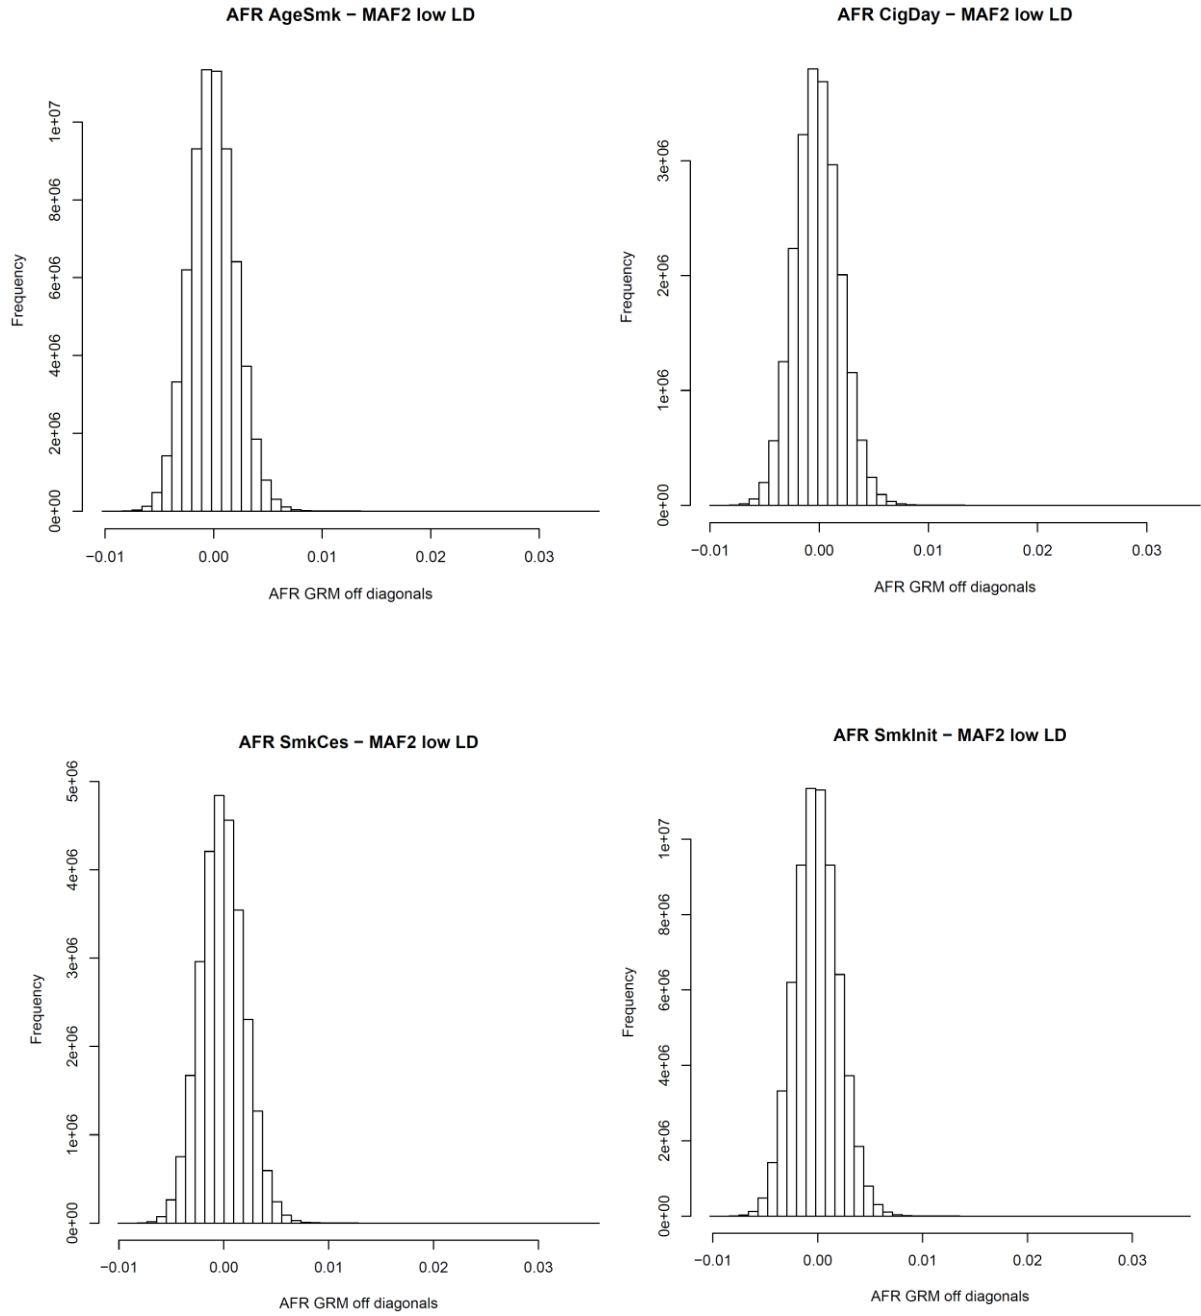

Supplementary Figure 5-4. Histogram of GRM off-diagonals from MAF 1-5% - low LD bin in African ancestry sample

AFR Smklnit – MAF3

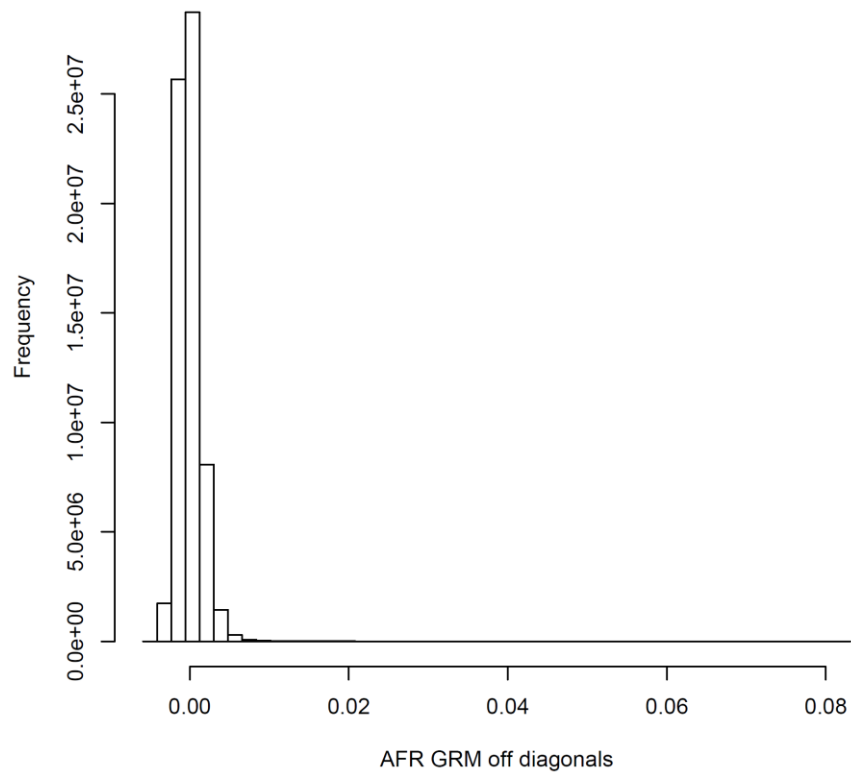

Supplementary Figure 5-5. Histogram of GRM off-diagonals from MAF 0.1-1% in bin African ancestry sample
